# Supplementary material for: Exploring a general multi-pronged activation strategy for natural product discovery in Actinomycetes
Source: Springer Nature journal article supplement (doi:10.1038/s42003-023-05648-7), 2024-01-06
Supplement: MOESM1 [file 42003_2023_5648_MOESM1_ESM.pdf]

# Supporting Information

## Exploring a general multi-pronged activation strategy for natural product discovery in Actinomycetes.

Dillon W. P. Tay<sup>a</sup>, Lee Ling Tan<sup>b</sup>, Elena Heng<sup>b</sup>, Nadiah Zulkarnain<sup>b</sup>, Kuan Chieh Ching<sup>c</sup>, Mario Wibowo<sup>c</sup>, Elaine Jinfeng Chin<sup>c</sup>, Zann Y. Tan<sup>c</sup>, Chung Yan Leong<sup>c</sup>, Veronica Wee Pin Ng<sup>c</sup>, Lay Kien Yang<sup>c</sup>, Deborah Chwee San Seow<sup>c</sup>, Yi Wee Lim<sup>a</sup>, Winston Koh<sup>d</sup>, Lokanand Koduru<sup>b</sup>, Yoganathan Kanagasundaram<sup>c</sup>, Siew Bee Ng<sup>c</sup>, Yee Hwee Lim<sup>a,e,#</sup>, Fong Tian Wong<sup>a,b,#</sup>

### Affiliations:

<sup>a</sup> Institute of Sustainability for Chemicals, Energy and Environment (ISCE<sup>2</sup>), Agency for Science, Technology and Research (A\*STAR), 8 Biomedical Grove, #07-01 Neuros Building, Singapore 138665, Republic of Singapore.

<sup>b</sup> Molecular Engineering Lab, Institute of Molecular and Cell Biology (IMCB), Agency for Science, Technology and Research (A\*STAR), 61 Biopolis Drive, #07-06, Proteos, Singapore 138673, Republic of Singapore.

<sup>c</sup> Singapore Institute of Food and Biotechnology Innovation (SIFBI), Agency for Science, Technology and Research (A\*STAR), 31 Biopolis Way, #01-02, Nanos, Singapore 138669, Republic of Singapore.

<sup>d</sup> Bioinformatics Institute (BII), Agency of Science, Technology and Research (A\*STAR), 30 Biopolis Street, #07-01, Matrix, Singapore 138671, Republic of Singapore

<sup>e</sup> Synthetic Biology Translational Research Program, Yong Loo Lin School of Medicine, National University of Singapore, 10 Medical Drive, Singapore 117597, Republic of Singapore

### #Corresponding authors

Y.H.L.: [lim\\_yee\\_hwee@isce2.a-star.edu.sg](mailto:lim_yee_hwee@isce2.a-star.edu.sg)

F.T.W.: [wongft@imcb.a-star.edu.sg](mailto:wongft@imcb.a-star.edu.sg)

## List of content:

**Figure S1.** Heatmap of metabolite upregulation by phiC31 integration of RedD and FAS in A1123 across 5 media.

**Figure S2.** Comparison of Surfactin A, B, and C LC-MS/MS abundances in fermentation extracts from 5 RedD mutants of A1123 in CA07LB media.

**Figure S3.** Genomic analyses of A1123 mutants integrated with npC697.

**Table S7.** Media compositions

**Table S8.** Identified metabolites detected by LC-MS/MS across 54 strains and their 459 mutants.

**Figure S4.** Fold change in metabolite LC-MS/MS abundances detected due to integration of SarA regulator across 5 strains (A1123, A1137, A2056, A33995, A80510).

**Figure S5.** Bioactivity profiling heatmap of strains with SarA regulator integrated.

**Figure S6.** Bioactivity profiling heatmap of strains with Crp regulator integrated.

**Figure S7.** Tandem mass spectra (MS/MS) comparison of lydicamycin analogs TPU-0037-A and TPU-0037-C.

**Figure S8.** Tandem mass spectra (MS/MS) comparison of lydicamycin analogs TPU-0037-A and TPU-0037-D.

**Figure S9.** Lydicamycin pathway specific regulator: lydicamycin cluster in A80510. A80510 LuxR amino acid sequence.

**Figure S10.** Bioactivity profiling heatmap of strains with AdpA regulator integrated.

**Figure S11.** Bioactivity profiling heatmap of strains with RedD regulator integrated.

**Figure S12.** Upregulation of tetramic acid compounds BE-54476-A (1) and BE-54476-B (2) in A58051 and its edited strains.

**Supplementary Material for BE-54476-A and BE-54476-B.** Bioactivity of Compounds 1 and 2

**Figure S13.** Structures of tetramic acid analogs and similar compounds.

**Table S9.** NMR assignments of BE-54476-A (1) and B (2).

**Figure S14.** Chemical structures of tetramic acid analogs.

**Figure S15.** Integration of overexpression cassette for SCO6196 into *Streptomyces sp.* A58051.

**Figure S16.** <sup>1</sup>H NMR spectrum (MeOH-*d*<sub>4</sub>, 400 MHz) of tetramic acid 1.

**Figure S17.** <sup>13</sup>C NMR spectrum (MeOH-*d*<sub>4</sub>, 100 MHz) of tetramic acid 1.

**Figure S18.** HSQC spectrum of tetramic acid 1.

**Figure S19.** HMBC spectrum of tetramic acid 1.

**Figure S20.** COSY spectrum of tetramic acid 1.

**Figure S21.** NOESY spectrum of tetramic acid 1.

**Figure S22.** <sup>1</sup>H NMR spectrum (MeOH-*d*<sub>4</sub>, 400 MHz) of tetramic acid 2.

**Figure S23.** <sup>13</sup>C NMR spectrum (MeOH-*d*<sub>4</sub>, 100 MHz) of tetramic acid 2.

**Figure S24.** HSQC spectrum of tetramic acid 2.

**Figure S25.** HMBC spectrum of tetramic acid 2.

**Figure S26.** COSY spectrum of tetramic acid 2.

**Figure S27.** NOESY spectrum of tetramic acid 2.

**Figure S28.** (–)-HRESIMS spectra of compounds 1 and 2.

**Figure S29.** UV spectra of compounds 1 and 2.

**Figure S30.** Dose response curve against *Klebsiella aerogenes* (ATCC® 13048™) (KA13048), *Pseudomonas aeruginosa* (ATCC® 9027™) (PA9027), *Aspergillus fumigatus* (ATCC® 46645™) (AF46645).

**Figure S31.** Dose response curve against *Staphylococcus aureus* Rosenbach (ATCC® 25923™) (SA25923).

**Figure S32.** Dose response curve against *Acinetobacter baumannii* (ATCC® 19606™) (ACB19606),

**Figure S33.** Dose response curve against the human lung carcinoma cells A549 (ATCC® CCL-185™) (A549).

**Table S10.** Bioactivity characterization of compounds BE-54476-A (1) and BE-54476-B (2).

**Figure S34.** <sup>1</sup>H NMR spectrum of [Leu<sup>7</sup>] surfactin iso-C14.

**Figure S35.** <sup>13</sup>C NMR spectrum of [Leu<sup>7</sup>] surfactin iso-C14.

**Figure S36.** <sup>1</sup>H NMR spectrum of [Leu<sup>7</sup>] surfactin anteiso-C15.

**Figure S37.** <sup>13</sup>C NMR spectrum of [Leu<sup>7</sup>] surfactin anteiso-C15.

**Figure S38.** <sup>1</sup>H NMR spectrum of [Leu<sup>7</sup>] surfactin iso-C15.

**Figure S39.** <sup>13</sup>C NMR spectrum of [Leu<sup>7</sup>] surfactin iso-C15.

**Table S11.** Integration cassette sequences.

**Figure S40.** Representative screening of A1301 mutants integrated with *kasO*\*p-SCO6196.

**Figure S41.** Representative sanger sequencing of PCR fragment to verify presence of *kasO*\*p and expression cassette SCO6196 (FAS).

**Figure S42.** Plasmid map of pCRP63.

**Figure S43.** Plasmid map of pCRP65.

**Figure S44.** Plasmid map of pCRP67.

**Figure S45.** Plasmid map of pCRP178.

**Figure S46.** Plasmid map of npC697.

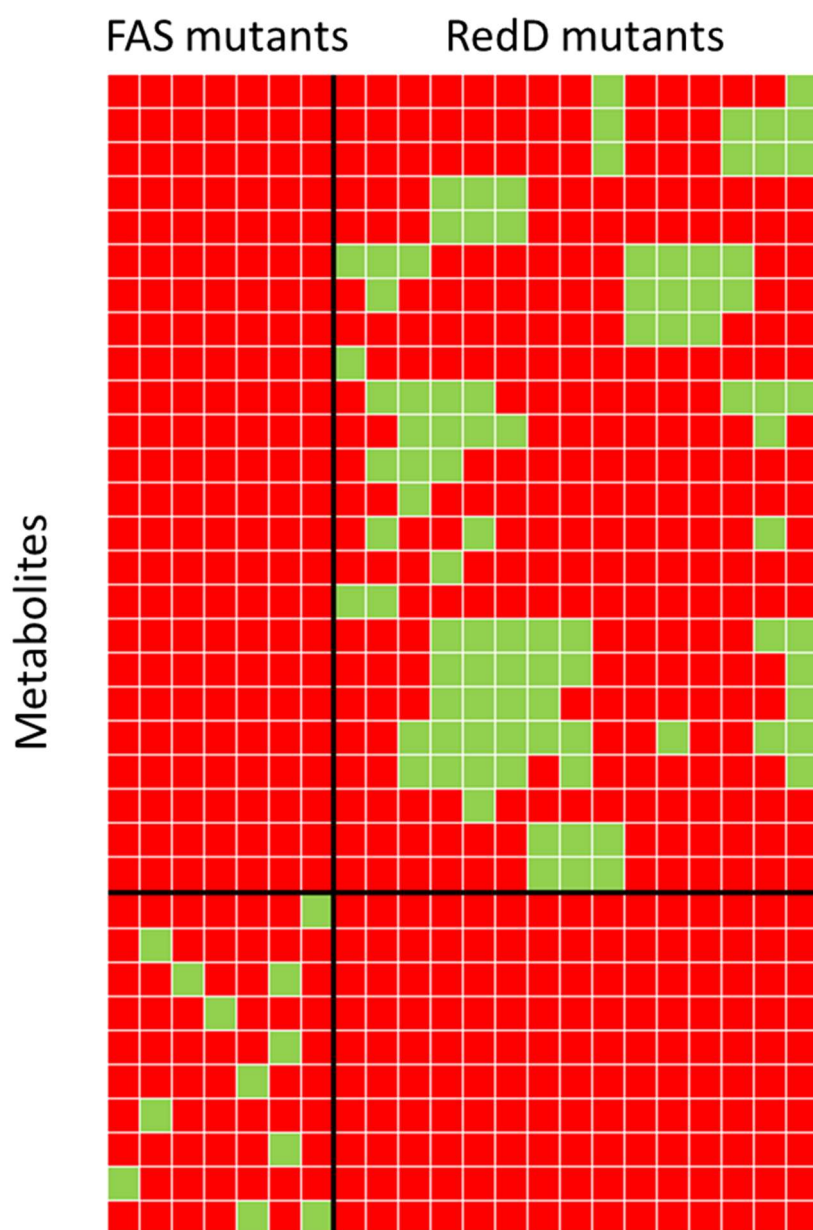

**Figure S1.** Heatmap of metabolite upregulation by phiC31 integration of RedD (n=15 independent mutants) and FAS (n=7 independent mutants) in A1123 across 5 media (CA02LB, CA07LB, CA08LB, CA09LB, CA10LB). Only selected metabolites not observed in parent strain are shown. Green indicates metabolite observed by LC-MS/MS in the fermentation extract of that mutant, red indicates not observed. Metabolites annotated via the Global Natural Products Social Molecular Networking (GNPS) Molecular Networking workflow (see Methods).



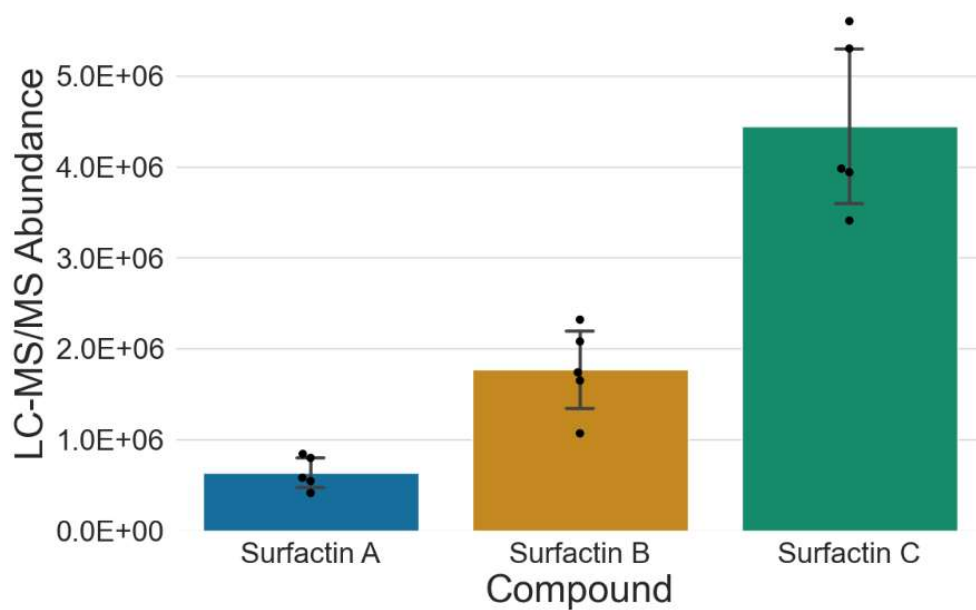

| Compound    | m/z     | A100208  | A100209  | A100212  | A100213  | A100214  |
|-------------|---------|----------|----------|----------|----------|----------|
| Surfactin A | 1008.66 | 5.46E+05 | 5.82E+05 | 8.44E+05 | 4.15E+05 | 8.00E+05 |
| Surfactin B | 1022.67 | 1.65E+06 | 1.74E+06 | 2.32E+06 | 1.07E+06 | 2.08E+06 |
| Surfactin C | 1036.69 | 3.98E+06 | 3.94E+06 | 5.30E+06 | 3.41E+06 | 5.60E+06 |

**Figure S2.** Comparison of Surfactin A, B, and C LC-MS/MS abundances in fermentation extracts from n=5 independent RedD mutants (A100208, A100209, A100212, A100213 and A100214) of A1123 in CA07LB media. See Methods for details on LC-MS/MS analysis of fermentation extracts. Error bars are shown for 1 standard deviation.

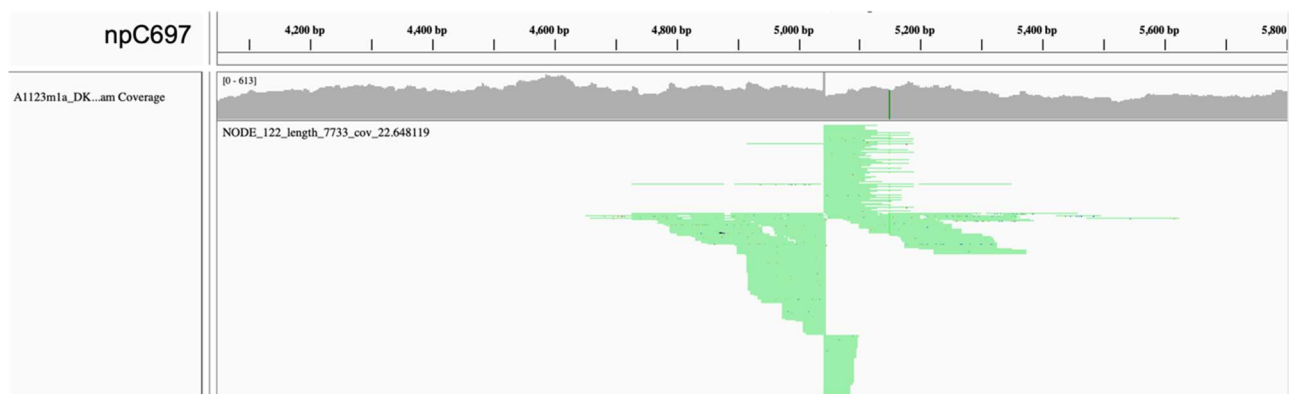

| Strain  | Native Strain ID | Modification     | X3     | X7                                 | counts |
|---------|------------------|------------------|--------|------------------------------------|--------|
| A100200 | A1123            | RedD integration | npC697 | NODE_122_length_7733_cov_22.648119 | 81     |
| A100201 | A1123            | RedD integration | npC697 | NODE_122_length_7733_cov_22.648119 | 166    |
| A100203 | A1123            | RedD integration | npC697 | NODE_122_length_7733_cov_22.648119 | 152    |
| A100204 | A1123            | RedD integration | npC697 | NODE_122_length_7733_cov_22.648119 | 130    |
| A100205 | A1123            | RedD integration | npC697 | NODE_122_length_7733_cov_22.648119 | 157    |
| A100206 | A1123            | RedD integration | npC697 | NODE_122_length_7733_cov_22.648119 | 142    |
| A100207 | A1123            | RedD integration | npC697 | NODE_122_length_7733_cov_22.648119 | 163    |
| A100208 | A1123            | RedD integration | npC697 | NODE_122_length_7733_cov_22.648119 | 90     |
| A100209 | A1123            | RedD integration | npC697 | NODE_122_length_7733_cov_22.648119 | 103    |
| A100210 | A1123            | RedD integration | npC697 | NODE_122_length_7733_cov_22.648119 | 136    |
| A100212 | A1123            | RedD integration | npC697 | NODE_122_length_7733_cov_22.648119 | 170    |
| A100214 | A1123            | RedD integration | npC697 | NODE_122_length_7733_cov_22.648119 | 259    |

**Figure S3. Genomic analyses of A1123 mutants integrated with npC697.** **Top:** Representative alignment of breakpoint reads crossing from npC697 (RedD integration) into the genome. Numbering of npC697 is given in Figure S46. **Bottom:** Table of number of paired reads (Counts) crossing the break points starting from attP site on npC697 (X3) to other location on the genome (X7). Only one integration event was observed in these strains.

**Table S7.** Media compositions

| <b>CA02LB</b>      | <b>CA07LB</b>                                             | <b>CA08LB</b>           | <b>CA09LB</b>      | <b>CA10LB</b>                                             |
|--------------------|-----------------------------------------------------------|-------------------------|--------------------|-----------------------------------------------------------|
| Mannitol 20g/L     | Glycerol 15g/L                                            | Glucose 15g/L           | Beef Extract 10g/L | Soluble Starch 20g/L                                      |
| Soybean Meal 20g/L | Oatmeal 30g/L                                             | Cane Molasses 20g/L     | Yeast Extract 4g/L | Soybean Meal 15g/L                                        |
| pH 7.5             | Yeast Extract 5g/L                                        | Soluble Starch 40g/L    | Glucose 20g/L      | KH <sub>2</sub> PO <sub>4</sub> 3g/L                      |
|                    | KH <sub>2</sub> PO <sub>4</sub> 5g/L                      | CaCO <sub>3</sub> 8g/L  | Glycerol 3g/L      | Na <sub>2</sub> HPO <sub>4</sub> .12H <sub>2</sub> O 2g/L |
|                    | Na <sub>2</sub> HPO <sub>4</sub> .12H <sub>2</sub> O 5g/L | Cotton seed flour 25g/L | pH 7.0             | Mg/LSO <sub>4</sub> .7H <sub>2</sub> O 0.5g/L             |
|                    | MgCl <sub>2</sub> .6H <sub>2</sub> O 1g/L                 | pH 7.2                  |                    | *Trace Salts Solution 1ml                                 |
|                    | pH natural                                                |                         |                    | pH 7.2                                                    |

\*Trace Salts Solution: Prepare a solution containing 0.2% each of the following: FeSO<sub>4</sub>.7H<sub>2</sub>O, MnCl<sub>2</sub>.4H<sub>2</sub>O, ZnSO<sub>4</sub>.7H<sub>2</sub>O, CuSO<sub>4</sub>.5H<sub>2</sub>O, CoCl<sub>2</sub>.2H<sub>2</sub>O

|           | 1                 | 2           | 3        | 4           | 5            | 6           | 7            |
|-----------|-------------------|-------------|----------|-------------|--------------|-------------|--------------|
| Strain ID | Desferrioxamine E | valinomycin | Monactin | Surfactin A | arthrobactin | Monoelaidin | Surugamide A |
| A1090     |                   |             |          |             |              |             |              |
| A1123     |                   |             |          | New         |              |             |              |
| A11345    |                   |             |          |             |              |             |              |
| A1137     |                   |             |          |             |              |             |              |
| A1301     |                   |             |          |             |              |             |              |
| A1532     |                   |             |          |             |              |             |              |
| A1636     |                   |             |          |             |              |             |              |
| A2056     |                   |             |          | Both        |              |             |              |
| A2278     |                   |             |          |             |              |             |              |
| A2705     |                   |             |          |             |              |             |              |
| A2957     |                   | Both        | Both     |             |              |             |              |
| A30639    | New               |             |          |             |              |             |              |
| A33995    |                   | Both        |          |             |              |             |              |
| A34001    | New               | Both        |          |             |              |             |              |
| A34053    |                   | Native      |          |             |              |             |              |
| A40707    |                   |             | Both     |             |              |             |              |
| A40926    |                   |             |          |             |              |             |              |
| A4217     | New               |             |          |             |              |             |              |
| A44034    | New               |             |          |             |              |             |              |
| A5252     | Both              |             |          |             |              |             |              |
| A53961    |                   |             |          |             |              |             |              |
| A58051    |                   |             |          |             |              |             |              |
| A5858     |                   |             |          |             |              |             |              |
| A61715    |                   | Both        |          |             |              |             |              |
| A6562     |                   |             |          |             |              |             |              |
| A80510    |                   |             |          | Native      |              |             |              |
| A8274     |                   |             |          |             |              |             |              |
| A8567     |                   |             |          |             |              |             |              |
| T10       | New               |             |          |             |              |             |              |
| T108      |                   |             |          |             |              |             |              |
| T118      | Both              |             |          |             |              |             | Both         |
| T1195     | Native            |             |          |             |              |             |              |
| T12       |                   |             |          |             |              |             |              |
| T1236     |                   |             |          |             | Native       |             |              |
| T1312     | New               |             |          |             |              |             |              |
| T1415     | New               |             |          |             |              |             |              |
| T1416     |                   |             |          |             |              |             |              |
| T1425     | New               |             | Both     |             |              |             |              |
| T1628     | Both              |             |          |             |              |             | Both         |
| T168      | Both              |             |          |             |              |             | Both         |
| T175      | Both              |             |          |             |              |             | Both         |
| T265      |                   |             |          |             | New          | New         |              |
| T271      |                   |             |          |             |              |             |              |
| T298      |                   |             |          | New         | Both         | New         |              |
| T302      |                   |             |          |             |              |             |              |
| T343      | New               |             |          |             |              |             |              |
| T354      | New               |             |          |             |              |             | Both         |
| T36       | Both              |             |          |             |              |             | Both         |
| T39       | Both              |             |          |             |              |             | Both         |
| T467      | New               |             |          |             |              |             |              |
| T4680     |                   | New         |          |             |              |             |              |
| T676      |                   |             |          |             |              |             |              |
| A100005   |                   |             |          |             |              |             |              |
| A100006   |                   |             |          |             |              |             |              |

### Legend

**New** – new to strain due to mutation  
**Both** – in both native and mutant strain  
**Native** – only in native strain, not observed in mutant strain

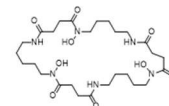

1 Desferrioxamine E

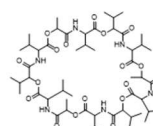

2 Valinomycin

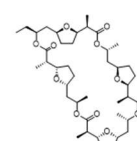

3 Monactin

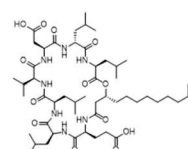

4 Surfactin A

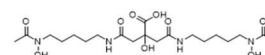

5 Arthrobactin

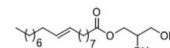

6 Monoelaidin

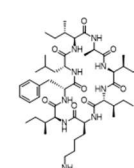

7 Surugamide A

**Table S8.** Metabolites detected by LC-MS/MS and identified by Global Natural Products Social Molecular Networking (GNPS) across 54 strains and their 459 mutants (see Figure 2). Pink (new) indicates metabolite is only detected in the strain after mutation. Grey (both) indicates that the metabolite is detected in both the native strain and its mutant. Blue (native) indicates that the metabolite is only detected in the native strain but not in its mutants. For analysis details please see Methods.

## List of Metabolites with >2x fold change

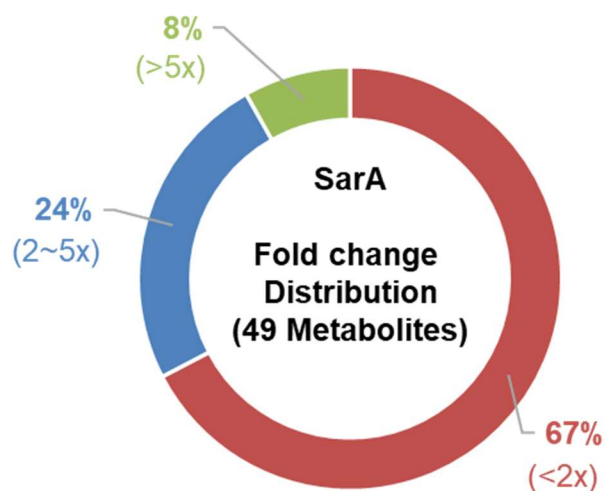

| Strain | Metabolite m/z | Fold Change |
|--------|----------------|-------------|
| A2056  | 261            | 18.8        |
| A33995 | 218            | 10.7        |
| A33995 | 389            | 7.1         |
| A80510 | 871            | 5.2         |
| A2056  | 496            | 4.3         |
| A80510 | 366            | 3.9         |
| A2056  | 510            | 3.8         |
| A2056  | 482            | 3.3         |
| A80510 | 841            | 3.2         |
| A80510 | 853            | 3.2         |
| A2056  | 478            | 2.7         |
| A1137  | 476            | 2.6         |
| A2056  | 451            | 2.3         |
| A33995 | 763            | 2.1         |
| A80510 | 265            | 2.1         |
| A33995 | 366            | 2.03        |

**Figure S4.** Fold change in metabolite LC-MS/MS abundances detected due to integration of SarA regulator across 5 strains (A1123, A1137, A2056, A33995, A80510).

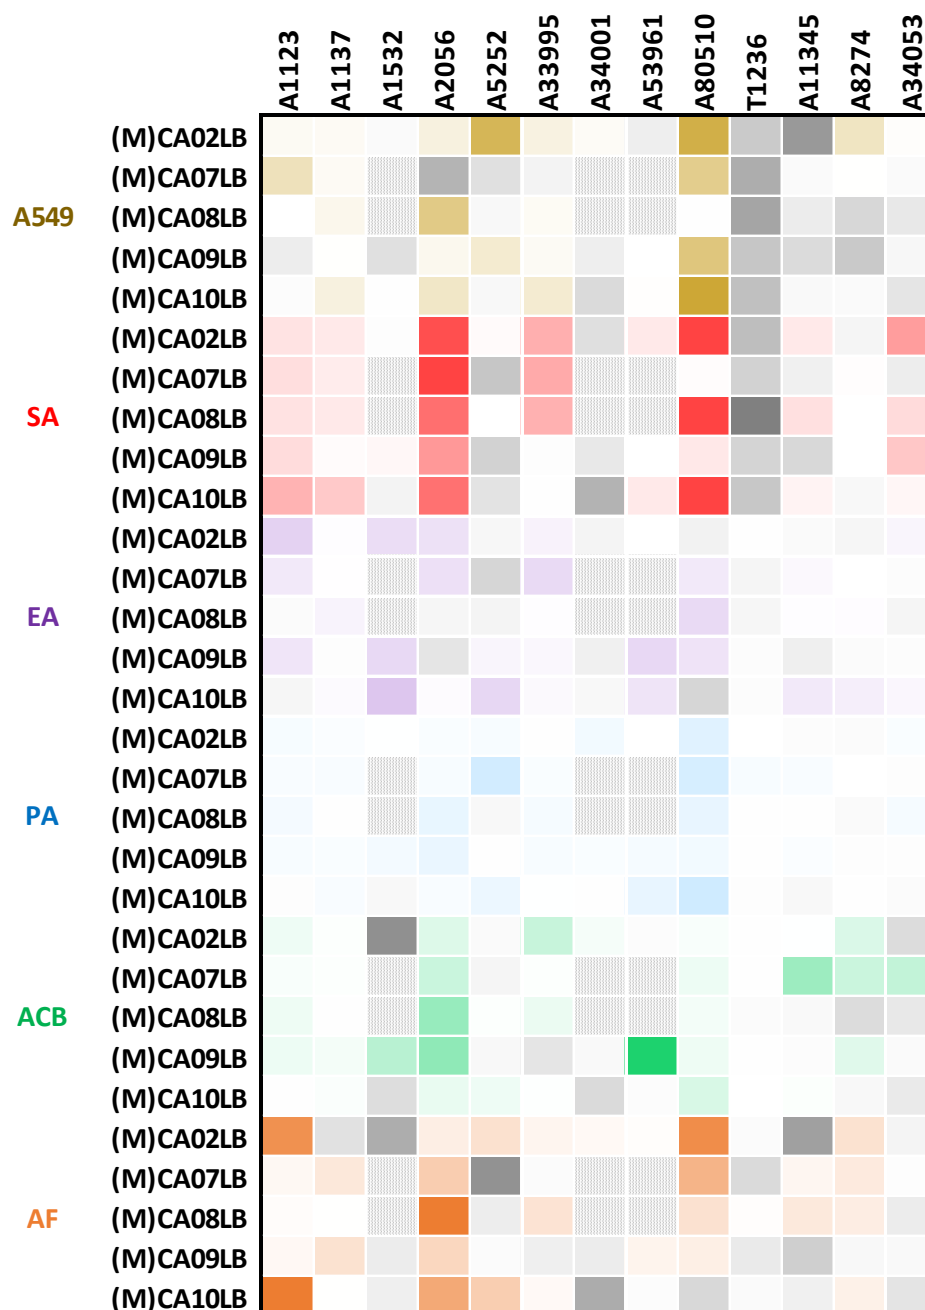

**Figure S5.** Differential bioactivity profiling of strains with SarA expression cassette integrated compared to their native strains. A549 (brown) = cell cytotoxicity against human lung carcinoma cells. SA (red) = antibacterial activity against *Staphylococcus aureus*. EA (purple) = antibacterial activity against *Klebsiella aerogenes*. PA (blue) = antibacterial activity against *Pseudomonas aeruginosa*. ACB (green) = antibacterial activity against *Acinetobacter baumannii*. AF (orange) = antifungal activity against *Aspergillus fumigatus*.

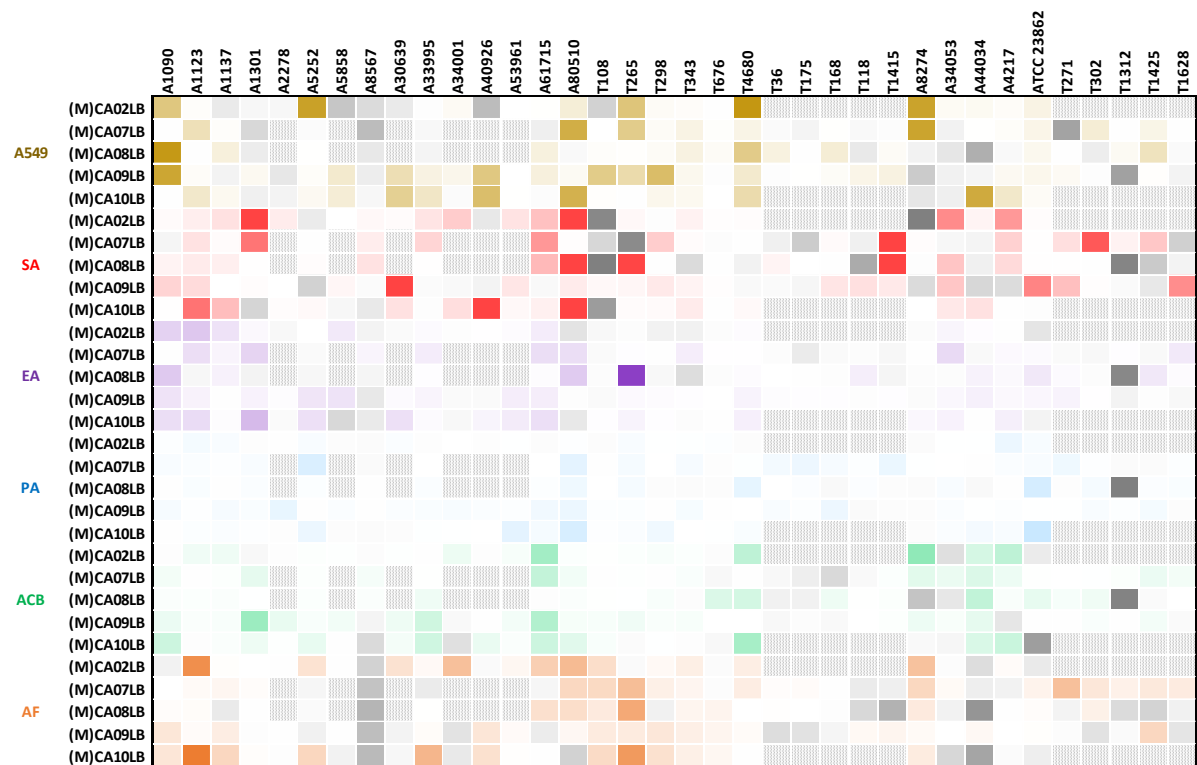

**Figure S6.** Differential bioactivity profiling of strains with Crp expression cassette integrated compared to their native strains. A549 (brown) = cell cytotoxicity against human lung carcinoma cells. SA (red) = antibacterial activity against *Staphylococcus aureus*. EA (purple) = antibacterial activity against *Klebsiella aerogenes*. PA (blue) = antibacterial activity against *Pseudomonas aeruginosa*. ACB (green) = antibacterial activity against *Acinetobacter baumannii*. AF (orange) = antifungal activity against *Aspergillus fumigatus*.





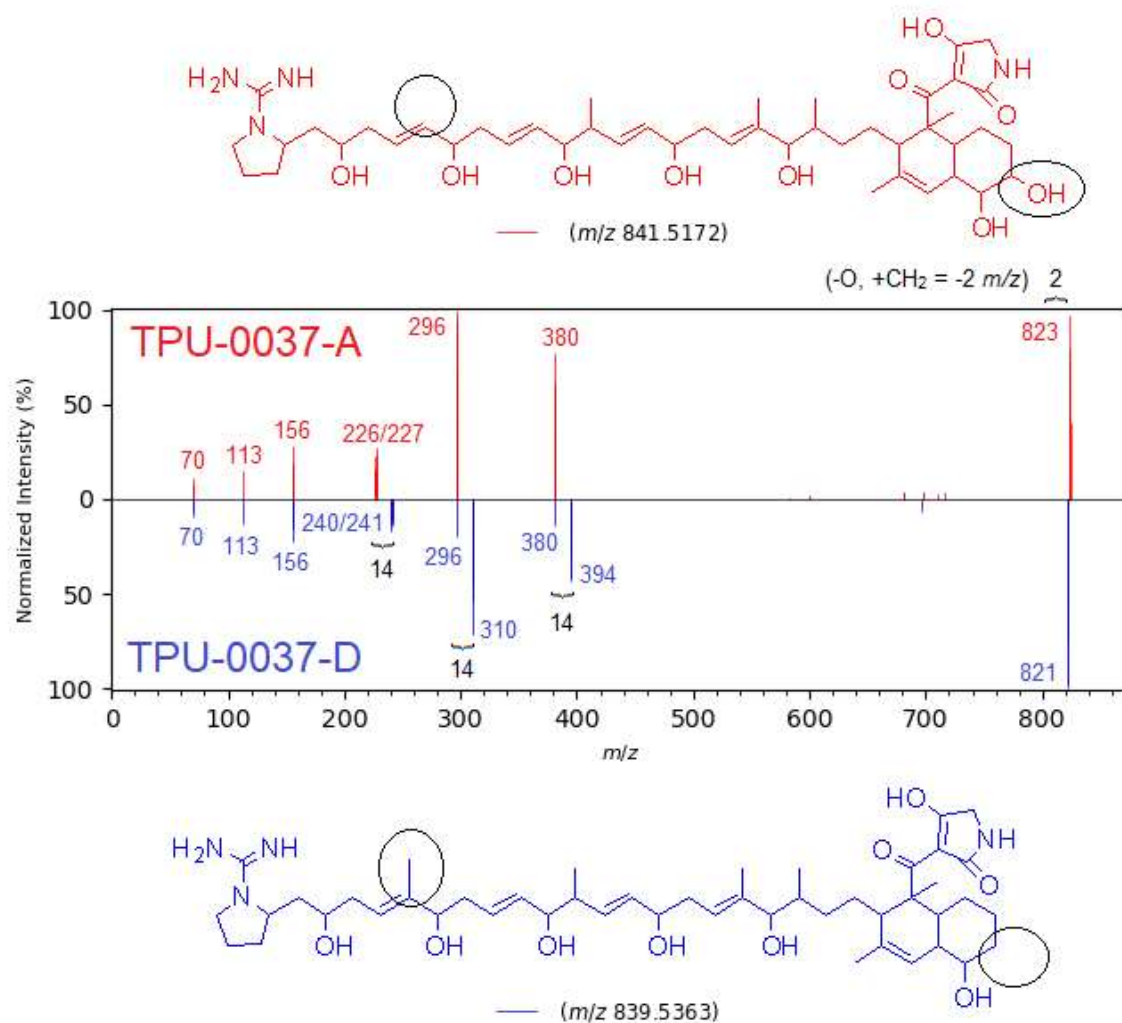

**Figure S8.** Tandem mass spectra (MS/MS) comparison of lydicamycin analogs TPU-0037-A and TPU-0037-D.

## Lydicamycin pathway specific regulator:

Query sequence

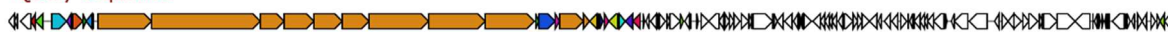

BGC0001477: lydicamycin (100% of genes show similarity), NRP + Polyketide:Modular type I

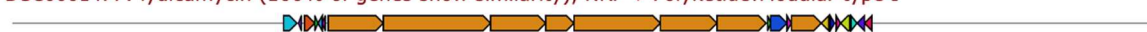

**Figure S9.** Lydicamycin cluster in A80510 in multi-gene blast against Lydicamycin miBIG, BGC0001477

>LuxR (from A80510, 100% sequence identity to Lydicamycin miBIG, BGC0001477)

MGLVERDAVIAELRTALSDSAKGCCKVAVIRGGIASGKTALFRAFEH HAVASGATLLRASGAPSEQSL  
RFGVIEQFFSGATTPEASAMLSHLTGLEAPQVGGEPPSPVQSGTRDAHDL CVGLLELSRKGPLVVT  
VDDHQFADPASLQVLTYLQHRIGTARVMLLLSQGTEPPSDLVAEALRQPYSRQFTLSPLSPEGVGQL  
LAQRDSSAALRQAPGSYALTGGNPLLTRALVDDSLAPGPDASAGAAAGPVTGQAFTRAVLACLHR  
GGPQLLR TARAI AVLGEFAAPALLARFLDVRPSVVGGALEALELAGLTIDAQFRYEGTRAAVLDELTP  
ERSALNRRAAELLHHDGVAPSDVVG YLLAAGEADEPWAARVLHAAADQALPHA EQALALGKVAEAV  
QYLEFASRSCGDEHKRAMLTARLAWVQWTSSPAAATRH HGPLQTALEKELLSGREVMRLV RSLAW  
HGRPKEAVRALES LGAPPEGDGSRDQAERKLTRQWLSRWHPQIFAQVERHAAMSEPPGSPGPARR  
PQTAVLPRGTGN SPAVEGAEQVLQRARVRETPLASVISALHELLAAERFERAMYWCNELLQKAEGQ  
HAAAWRGVLLDTRAAVSLRLGDLADAERDACSALTALSARSWGVAIGSPLSHAVHAATMRGHFDKA  
AEFLNQMI PQAMMDTRYGLQYRTARGHFHLATDRPHAALEDFAVGDLVVKWKLDHPMTLPWRGD  
LAQALVRVGQTD RARELIKDQLRMIGTDSTRMRGVSLGILASVSDLKQRLPLLGEVVDLLQAGGD RYE  
LARA FVELGQVWQILGKLDRAQLIRRRALQLAKSCHAEQLYNQLVATREPLNSETTPSQWEDAEGMA  
VLSEAERRVAALAALGR TNREIGRKLHITVSTVEQHLTRVYRKL NIKRRADLPVGLPADIADIA

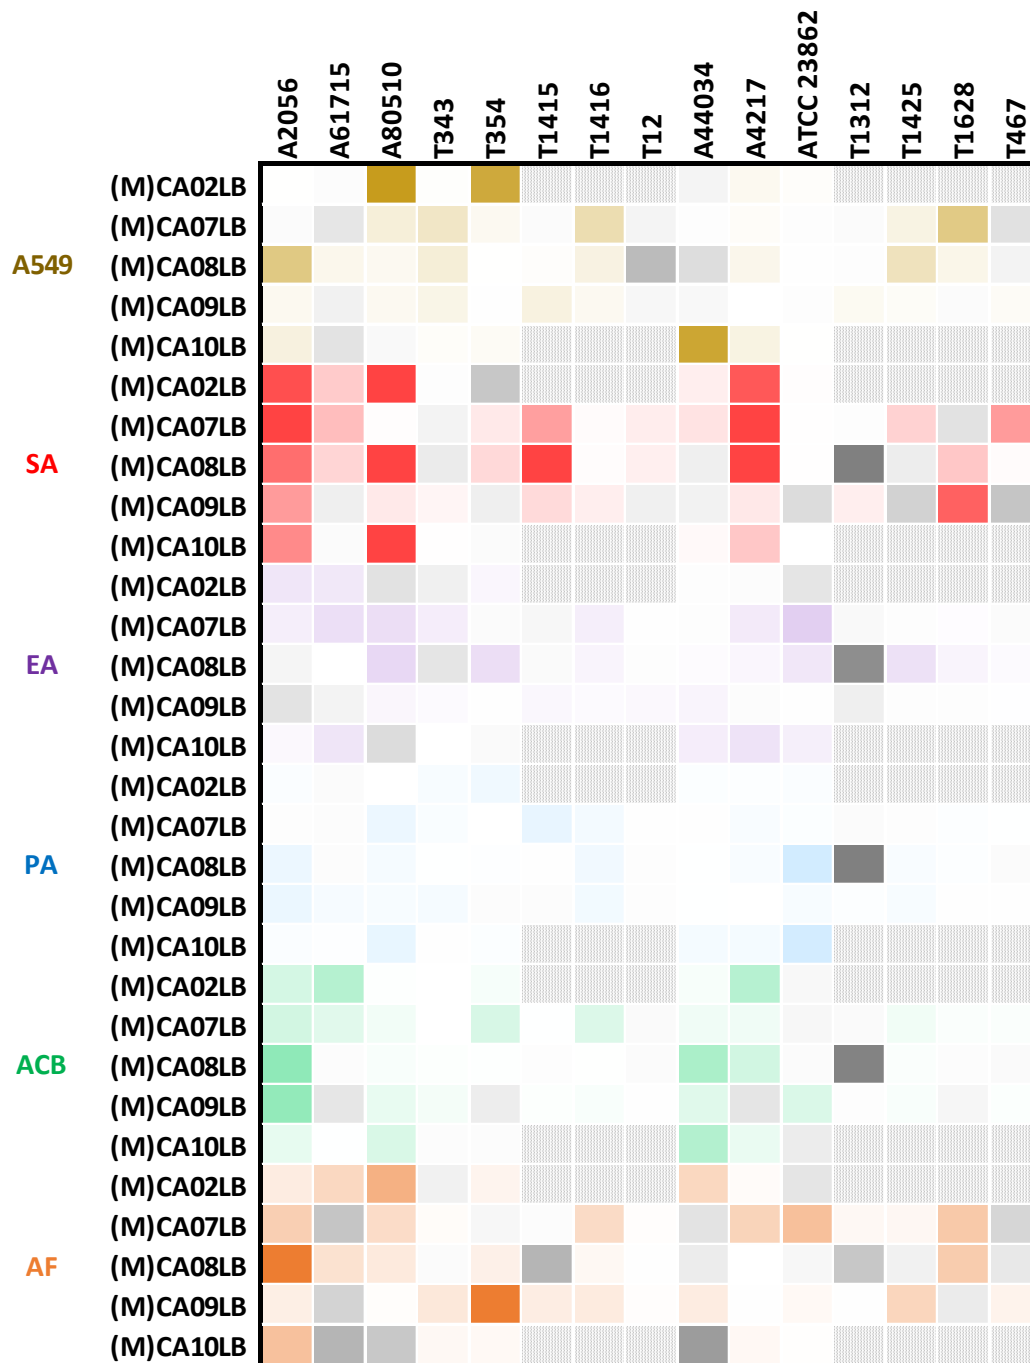

**Figure S10.** Differential bioactivity profiling of strains with AdpA expression cassette integrated compared to their native strains. A549 (brown) = cell cytotoxicity against human lung carcinoma cells. SA (red) = antibacterial activity against *Staphylococcus aureus*. EA (purple) = antibacterial activity against *Klebsiella aerogenes*. PA (blue) = antibacterial activity against *Pseudomonas aeruginosa*. ACB (green) = antibacterial activity against *Acinetobacter baumannii*. AF (orange) = antifungal activity against *Aspergillus fumigatus*.

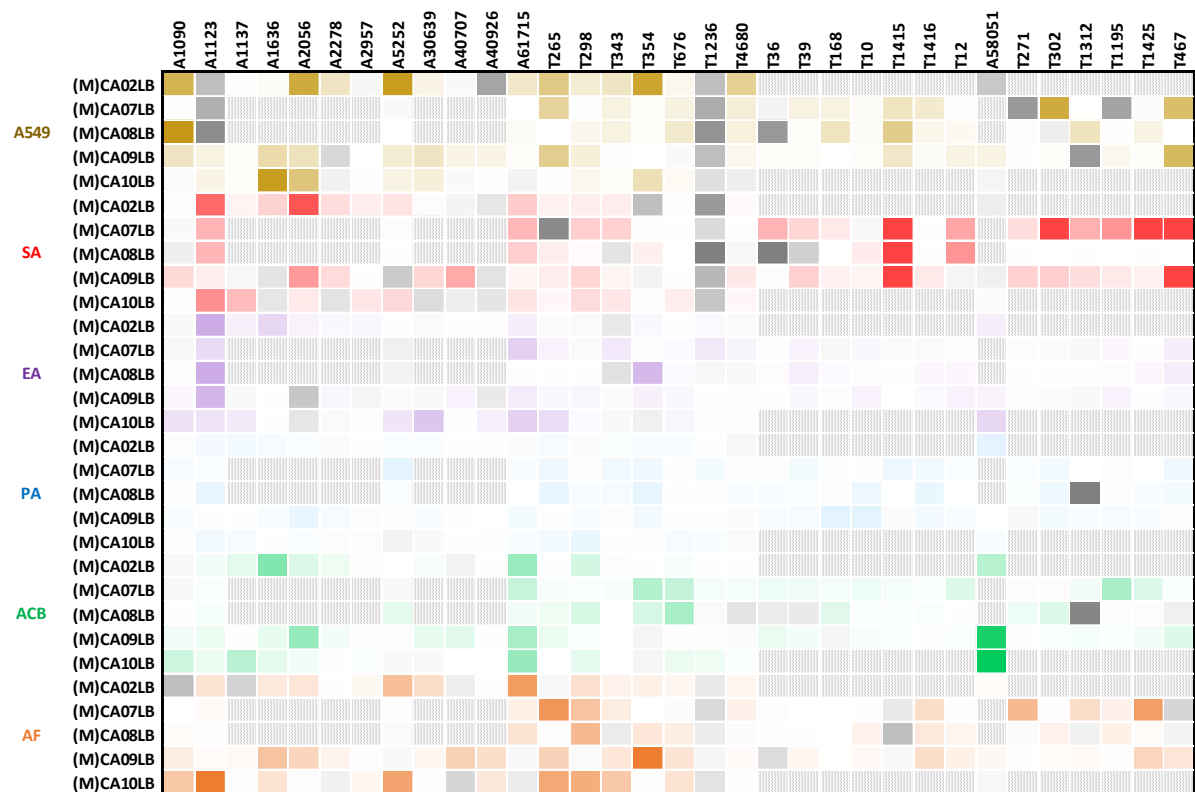

**Figure S11.** Differential bioactivity profiling of strains with SARP, RedD, expression cassette integrated compared to their native strains. A549 (brown) = cell cytotoxicity against human lung carcinoma cells. SA (red) = antibacterial activity against *Staphylococcus aureus*. EA (purple) = antibacterial activity against *Klebsiella aerogenes*. PA (blue) = antibacterial activity against *Pseudomonas aeruginosa*. ACB (green) = antibacterial activity against *Acinetobacter baumannii*. AF (orange) = antifungal activity against *Aspergillus fumigatus*.

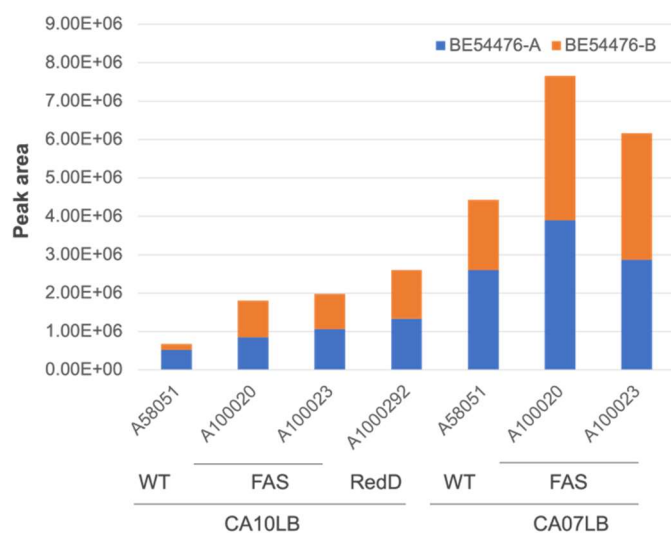

**Figure S12.** Upregulation of tetramic acid compounds BE-54476-A (1) and BE-54476-B (2) in A58051 and its edited strains.

## Bioactivity of Compounds 1 and 2

Compounds **1** (BE 54476-A) and **2** (BE 54476-B) were tested for their antimicrobial activity against a panel of microorganisms consisting of Gram-positive and Gram-negative bacteria, as well as one fungal strain: *Acinetobacter baumannii* (ATCC® 19606™), *Klebsiella aerogenes* (ATCC® 13048™), *Pseudomonas aeruginosa* (ATCC® 9027™), *Staphylococcus aureus* Rosenbach (ATCC® 25923™) and *Aspergillus fumigatus* (ATCC® 46645™).

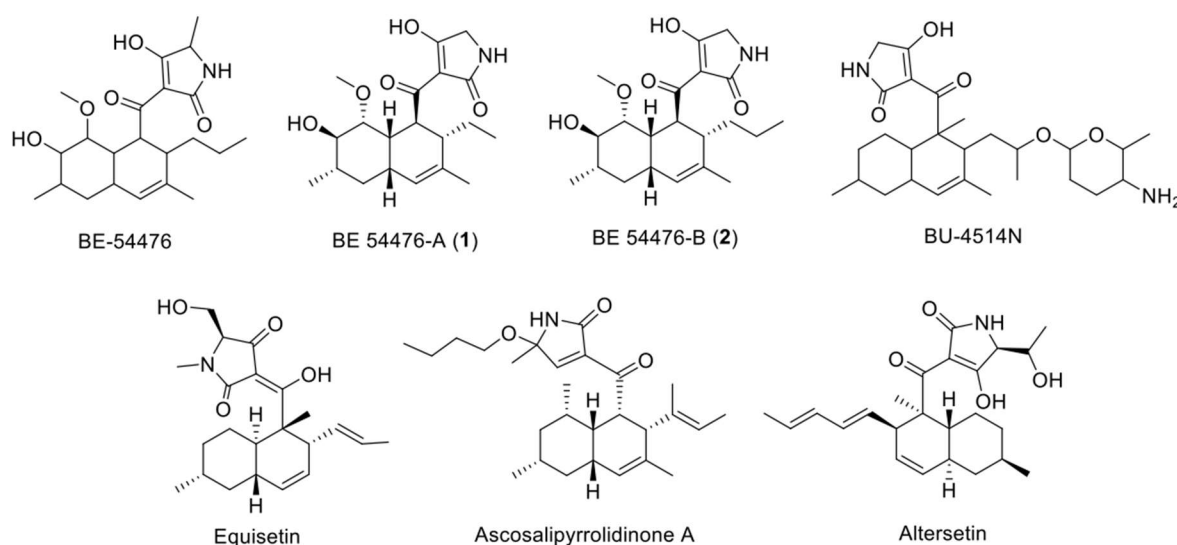

**Figure S13.** Structures of tetramic acid analogs and similar compounds.

Structurally similar tetramic acid analogs have been reported to exhibit antimicrobial activity, mainly against Gram-positive bacteria or anti-tumor activity. For example, equisetin has been reported to be active against *Staphylococcus erythraea* and *Staphylococcus aureus*.<sup>1</sup> Ascosalipyrrolidinone A was reported to be active against *Bacillus megaterium*,<sup>2</sup> *Mycotypha microsporum*, and *Microbotryum violaceum*, while BU-4514N<sup>3</sup> and the fungal metabolite altersetin<sup>4</sup> possess inhibitory activity against several Gram-positive bacteria. Notably, the antibiotic BE-54476, which possesses high structural similarity with compounds **1** and **2** was reported to not only have anti-tumor activity, but also antibacterial activity against Gram-positive bacteria such as *Bacillus subtilis*, *Enterococcus faecalis*, and *Staphylococcus aureus*.<sup>5</sup> Both compounds **1** and **2** were found to be inactive against Gram-negative bacteria *Klebsiella aerogenes* (ATCC® 13048™), *Pseudomonas aeruginosa* (ATCC® 9027™) and fungal strain *Aspergillus fumigatus* (ATCC® 46645™) (Table S10, Figure S30). However,

Compounds **1** and **2** showed activity against *Staphylococcus aureus* Rosenbach (ATCC® 25923™) (**Table S10, Figure S31**) with minimum inhibitory concentrations (MIC<sub>50</sub>) of 14.5 µM and minimum bactericidal concentrations (MBC<sub>50</sub>) of 65.5 µM for compound **1** and MIC<sub>50</sub> of 7.5 µM, MBC<sub>50</sub> of 22.3 µM for Compound **2**. Interestingly, the compounds were also found to be active against Gram-negative strain *Acinetobacter baumannii* (ATCC® 19606™) (**Table S10, Figure S32**), with MIC<sub>50</sub> of 9.8 µM for Compound **1** and MIC<sub>50</sub> of 6.9 µM for Compound **2**. No MBC activities were observed in antimicrobial testing of *Acinetobacter baumannii*. Apart from that, both compounds were also tested for their cytotoxicity against the human lung carcinoma cell line A549 (ATCC® CCL-185™) with IC<sub>50</sub> of 34.4 µM and 46.3 µM respectively (**Table S10, Figure S33**).

**Table S9.**  $^1\text{H}$  and  $^{13}\text{C}$  NMR data of tetramic acid analogs, BE-54476-A (**1**) and B (**2**) in  $\text{MeOH-}d_4$ .

| Pos.  | <b>1</b>                           |                                                 | <b>2</b>                   |                                                 |
|-------|------------------------------------|-------------------------------------------------|----------------------------|-------------------------------------------------|
|       | $\delta_{\text{C}}$ , type         | $\delta_{\text{H}}$ , mult. ( $J = \text{Hz}$ ) | $\delta_{\text{C}}$ , type | $\delta_{\text{H}}$ , mult. ( $J = \text{Hz}$ ) |
| 1     | 201.8, <sup>a</sup> C              | –                                               | <sup>b</sup>               | –                                               |
| 2     | 38.9, CH                           | 4.06, dd (12.0)                                 | 39.3, CH                   | 4.09, dd (12.3)                                 |
| 3     | 45.3, CH                           | 2.57, br d (10.0)                               | 44.9, CH                   | 2.53, br d (10.0)                               |
| 4     | 135.4, C                           | –                                               | 135.8, C                   | –                                               |
| 5     | 129.0, CH                          | 5.61, d (6.0)                                   | 128.4, CH                  | 5.56, d (5.8)                                   |
| 6     | 37.3, CH                           | 2.12, m                                         | 37.2, CH                   | 2.10, m                                         |
| 7     | 38.2, CH <sub>2</sub>              | 1.15, ddd (12.3, 12.3, 12.3);<br>1.65, m        | 38.2, CH <sub>2</sub>      | 1.14, ddd (12.9, 12.9, 12.9);<br>1.63, m        |
| 8     | 38.7, CH                           | 1.39, m                                         | 38.9, CH                   | 1.39, m                                         |
| 9     | 75.1, CH                           | 3.43, m                                         | 75.1, CH                   | 3.44, m                                         |
| 10    | 88.9, CH                           | 2.99, dd (4.3, 9.8)                             | 88.8, CH                   | 2.97, dd (4.4, 9.7)                             |
| 11    | 40.8, CH                           | 2.76, ddd (4.3, 4.3, 12.0)                      | 40.9, CH                   | 2.74, dt (4.4, 4.4, 12.3)                       |
| 12    | 21.9, CH <sub>2</sub>              | 1.29, m                                         | 18.2, CH <sub>2</sub>      | 1.48, m                                         |
| 13    | 8.6, CH <sub>3</sub>               | 0.75, t (7.4)                                   | 32.3, CH <sub>2</sub>      | 1.29, m                                         |
| 14    | 21.1, CH <sub>3</sub>              | 1.63, s                                         | 21.2, CH <sub>3</sub>      | 1.63, s                                         |
| 15    | 18.8, CH <sub>3</sub>              | 1.04, d (6.4)                                   | 18.8, CH <sub>3</sub>      | 1.04, d (6.3)                                   |
| 16    | 58.3, CH <sub>3</sub>              | 3.26, s                                         | 58.3, CH <sub>3</sub>      | 3.25, s                                         |
| 2'    | 178.2, <sup>a</sup> C              | –                                               | 178.0, C                   | –                                               |
| 3'    | 104.5, <sup>a</sup> C              | –                                               | <sup>b</sup>               | –                                               |
| 4'    | 196.1, <sup>a</sup> C              | –                                               | 196.0, C                   | –                                               |
| 5'    | 52.9, <sup>a</sup> CH <sub>2</sub> | 3.75 (2H), br s                                 | 52.5, CH <sub>2</sub>      | 3.73 (2H), br s                                 |
| 13-Me | –                                  | –                                               | 15.0, CH <sub>3</sub>      | 0.81, t (6.9)                                   |

$^1\text{H}$  (400 MHz) and  $^{13}\text{C}$  (100 MHz) in  $\text{MeOH-}d_4$ . Assignments based on COSY, NOESY, HSQC and HMBC. Chemical shifts ( $\delta$ ) in ppm. s: singlet; br s: broad singlet; d: doublet; br d: broad doublet; t: triplet; m: multiplet. One proton unless otherwise stated. <sup>a</sup>Broad signal. <sup>b</sup>Not detected.



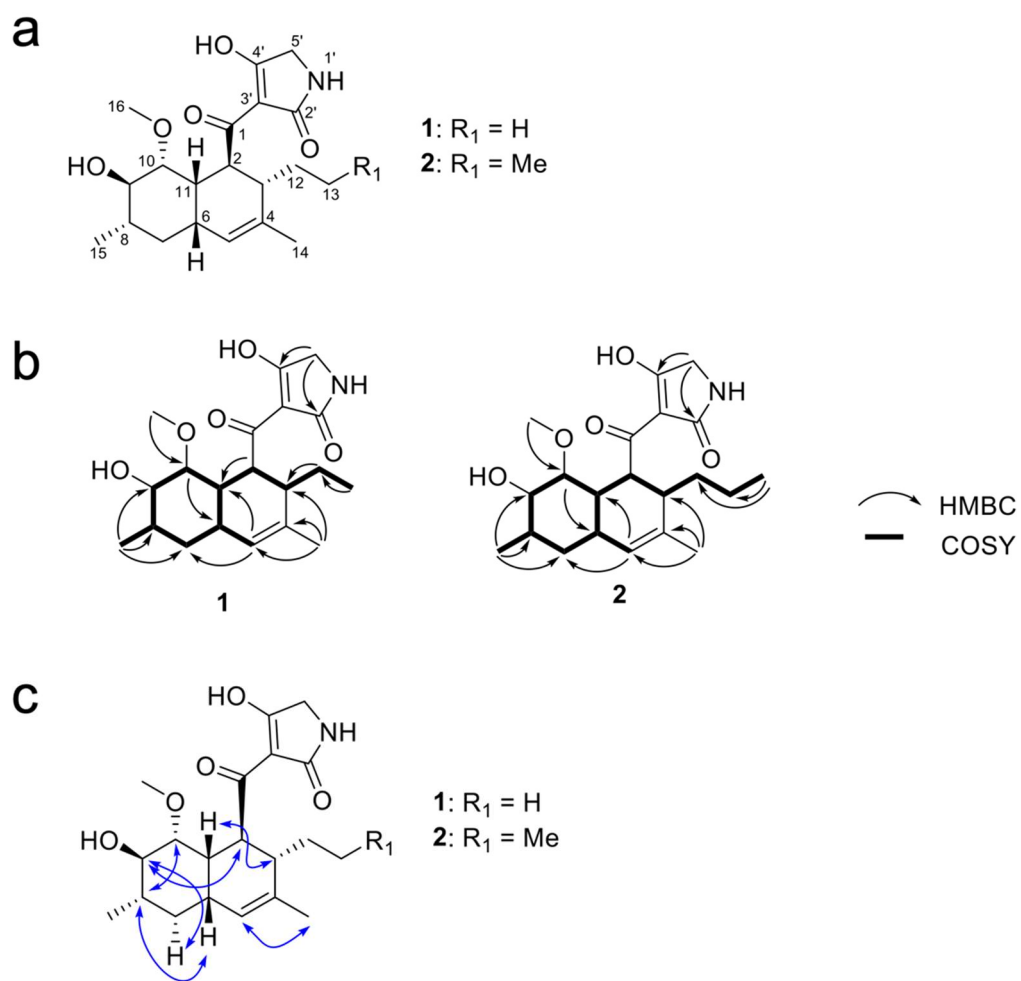

**Figure S14:** Chemical structures of the tetramic acid analogs, BE 54476-A (**1**) and B (**2**) (relative configurations of the stereocenters were determined via NOESY correlations). (B) Selected COSY and HMBC correlations of BE 54476-A (**1**) and B (**2**). (C) Selected NOESY correlations of BE 54476-A (**1**) and B (**2**).

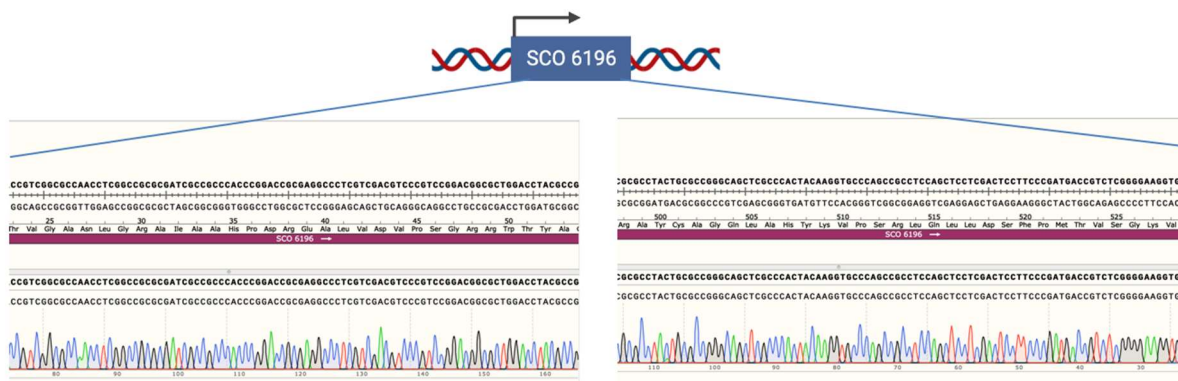

**Figure S15.** Integration of overexpression cassette for SCO6196 into *Streptomyces sp.* A58051.

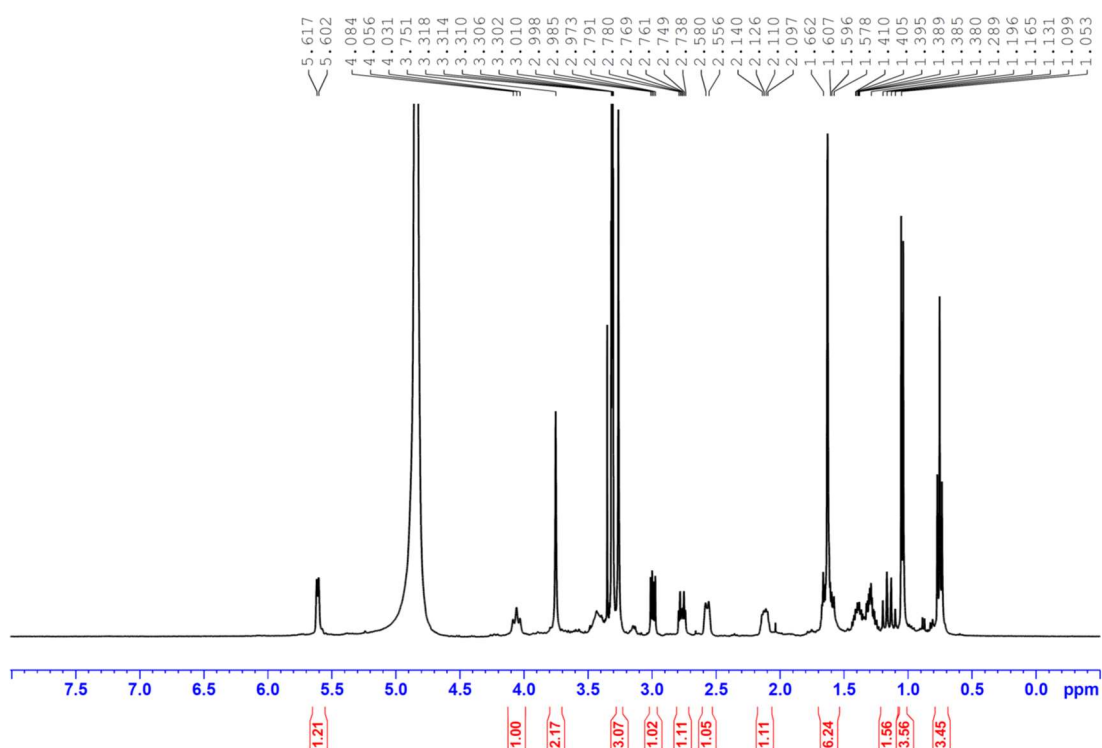

**Figure S16.**  $^1\text{H}$  NMR spectrum (MeOH- $d_4$ , 400 MHz) of tetramic acid **1**.

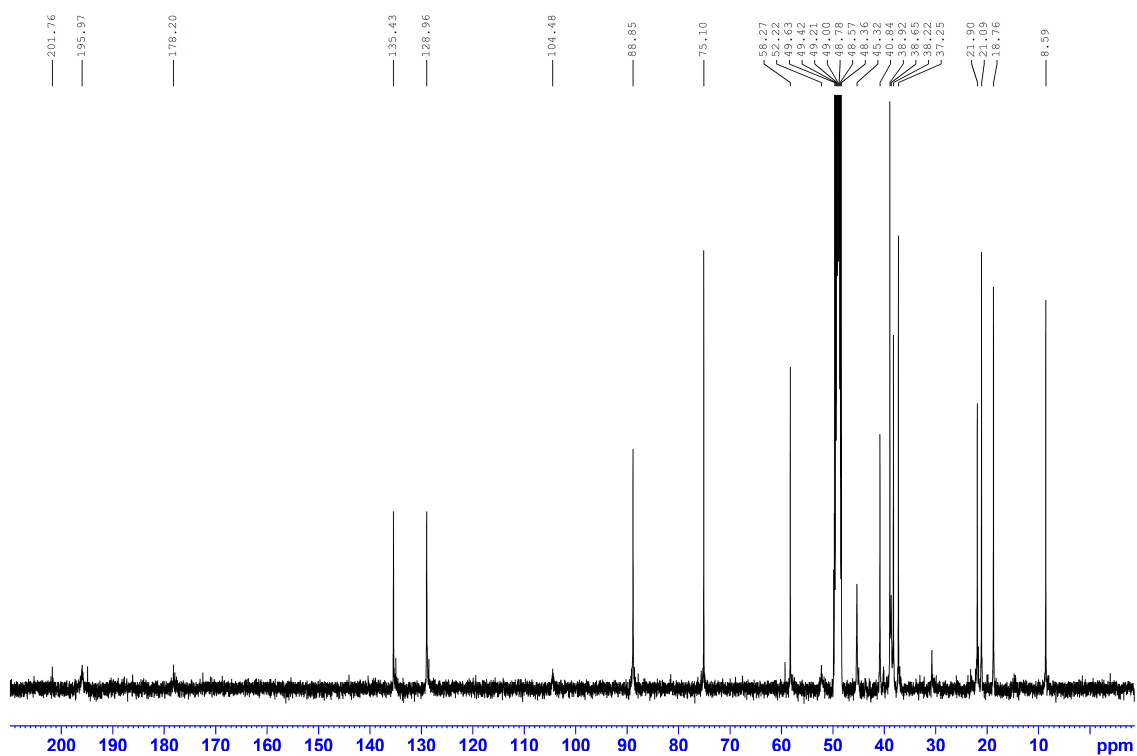

**Figure S17.**  $^{13}\text{C}$  NMR spectrum (MeOH- $d_4$ , 100 MHz) of tetramic acid **1**.

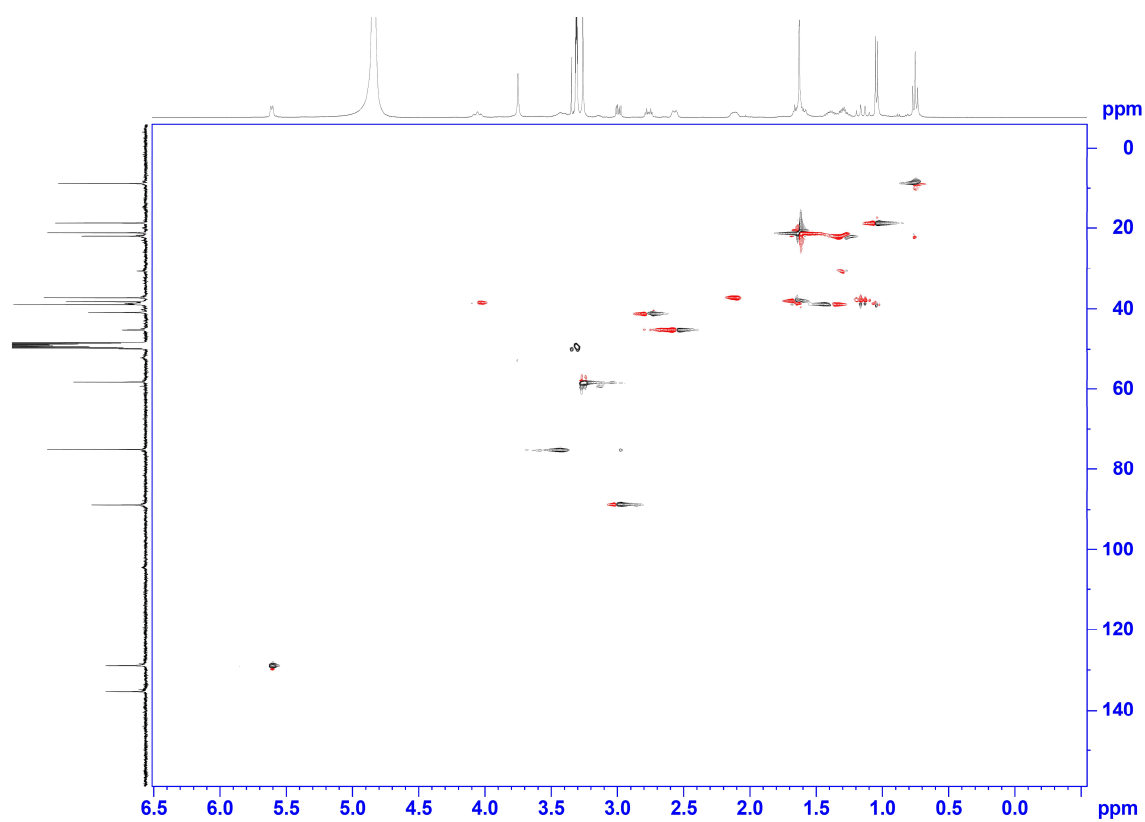

**Figure S18.** HSQC spectrum of tetramic acid **1**.

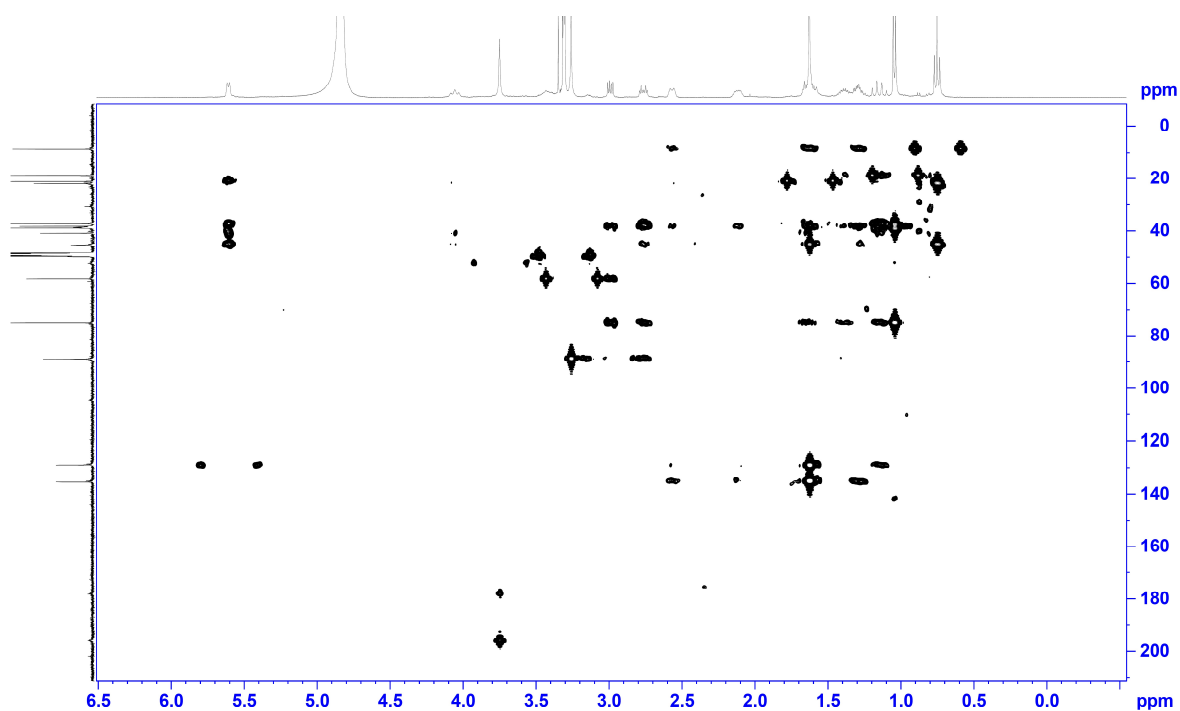

**Figure S19.** HMBC spectrum of tetramic acid **1**.

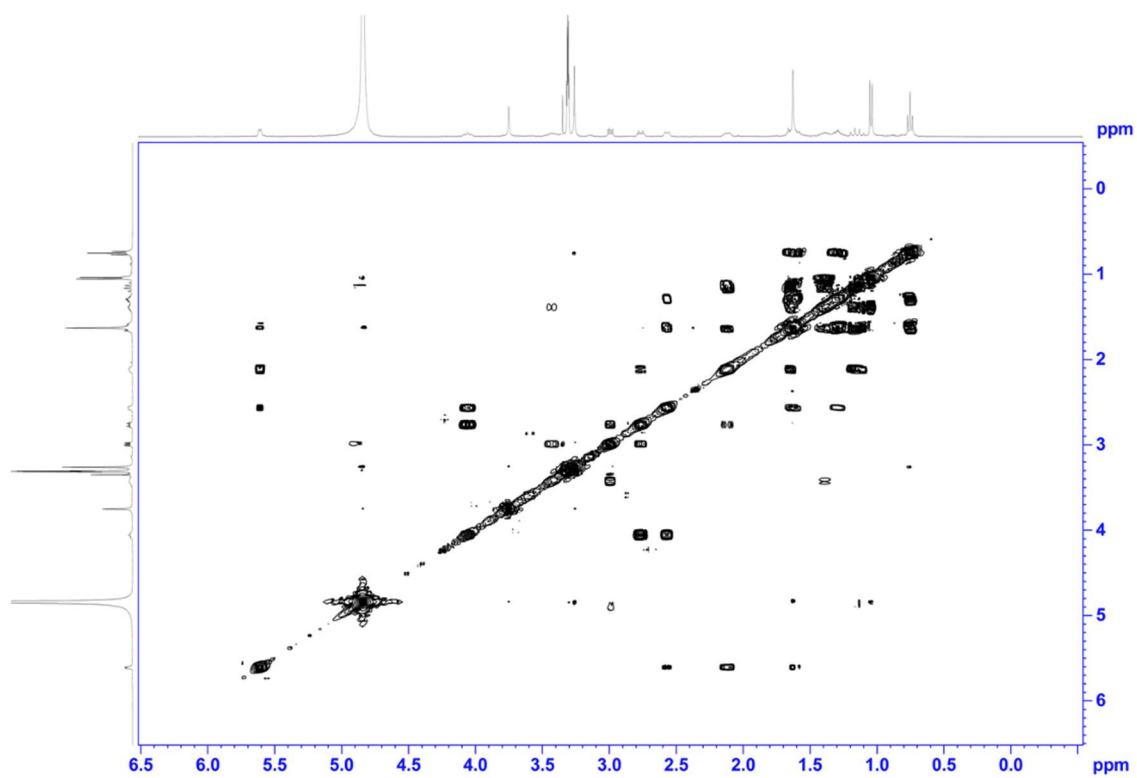

**Figure S20.** COSY spectrum of tetramic acid **1**.

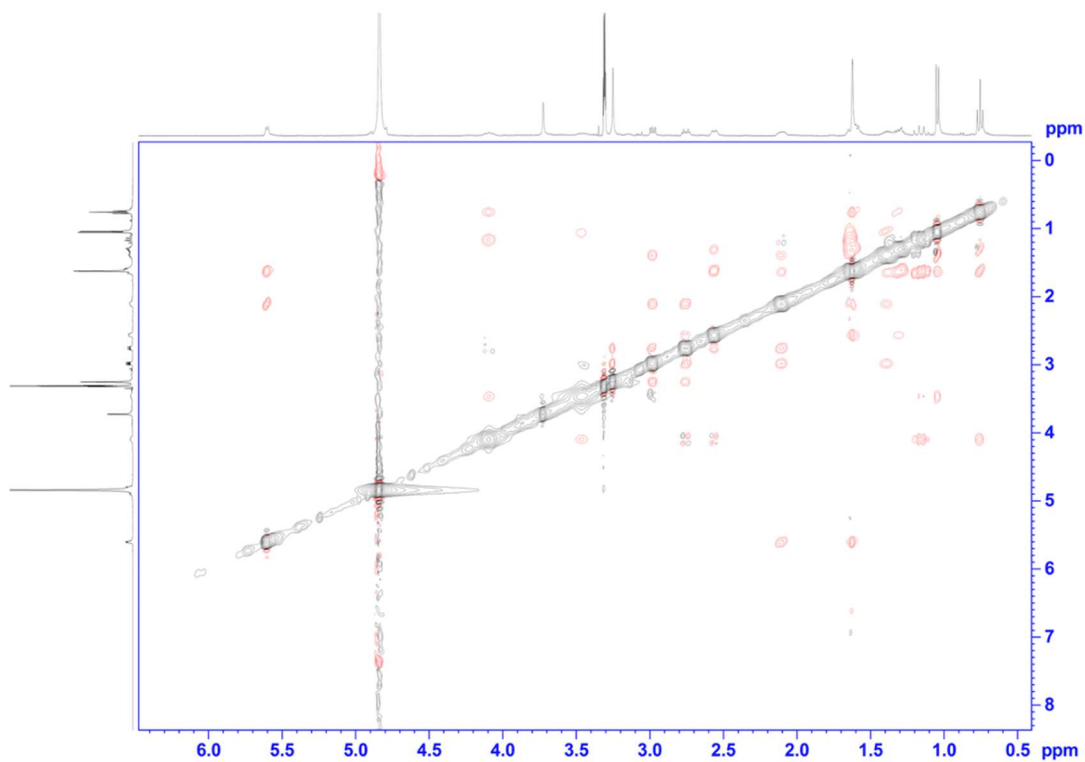

**Figure S21.** NOESY spectrum of tetramic acid **1**.

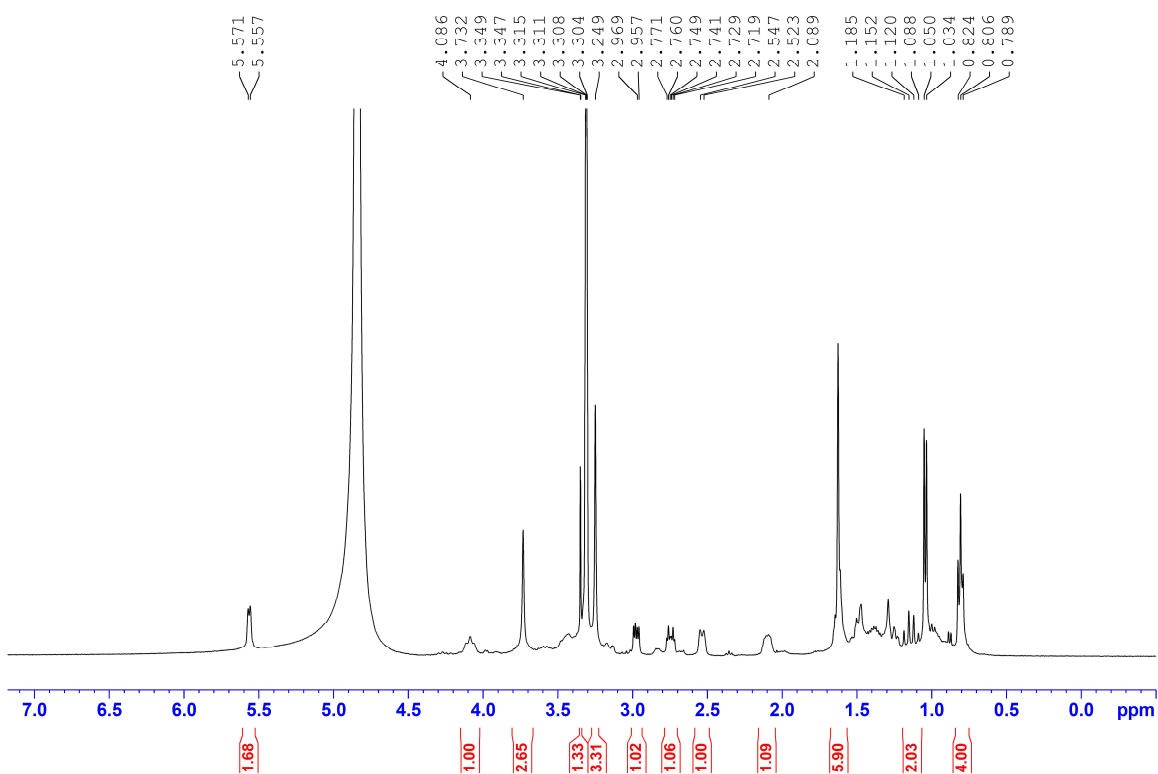

**Figure S22.**  $^1\text{H}$  NMR spectrum (MeOH- $d_4$ , 400 MHz) of tetramic acid **2**.

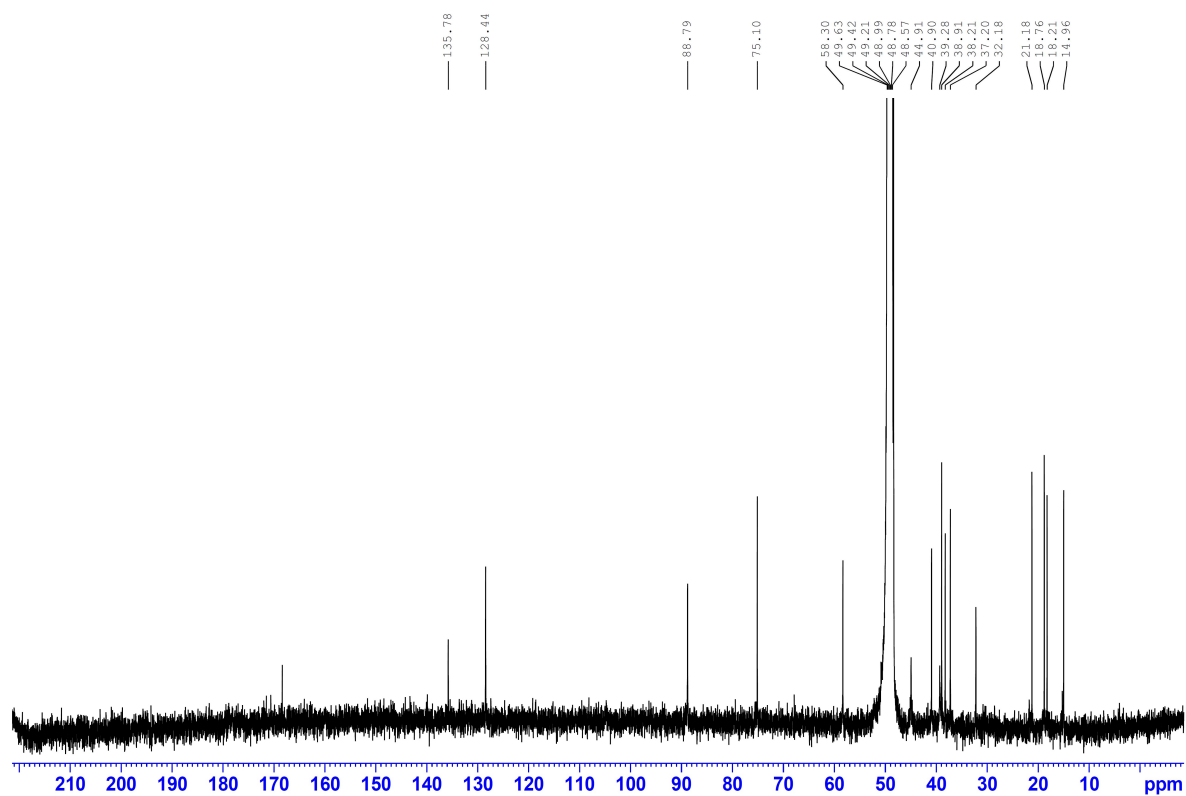

**Figure S23.**  $^{13}\text{C}$  NMR spectrum ( $\text{MeOH-}d_4$ , 100 MHz) of tetramic acid **2**.

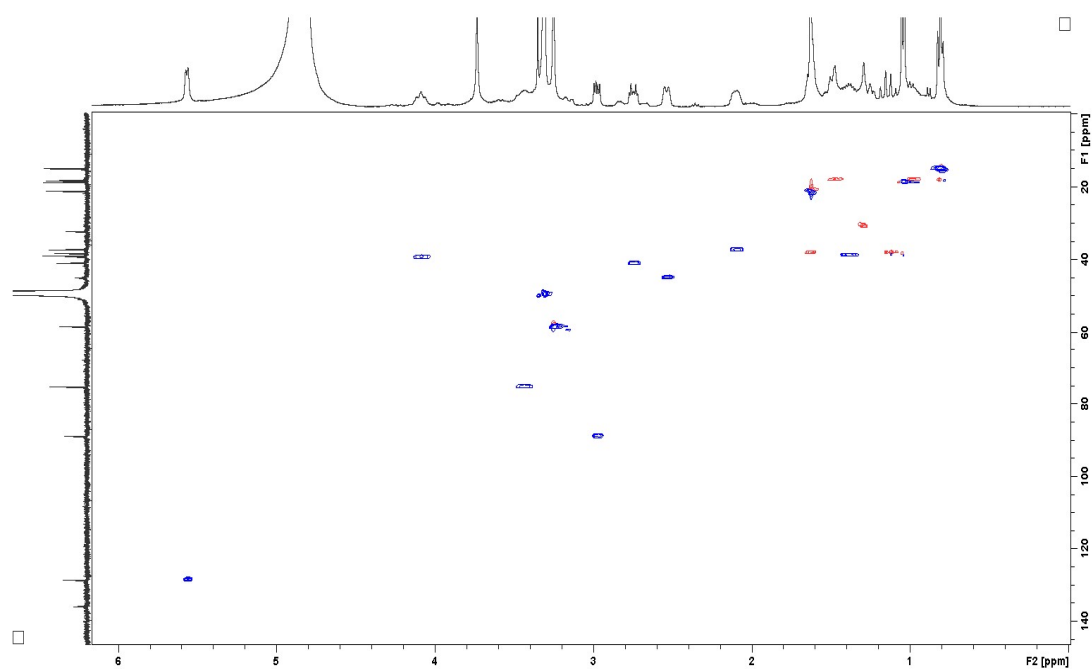

**Figure S24.** HSQC spectrum of tetramic acid **2**.

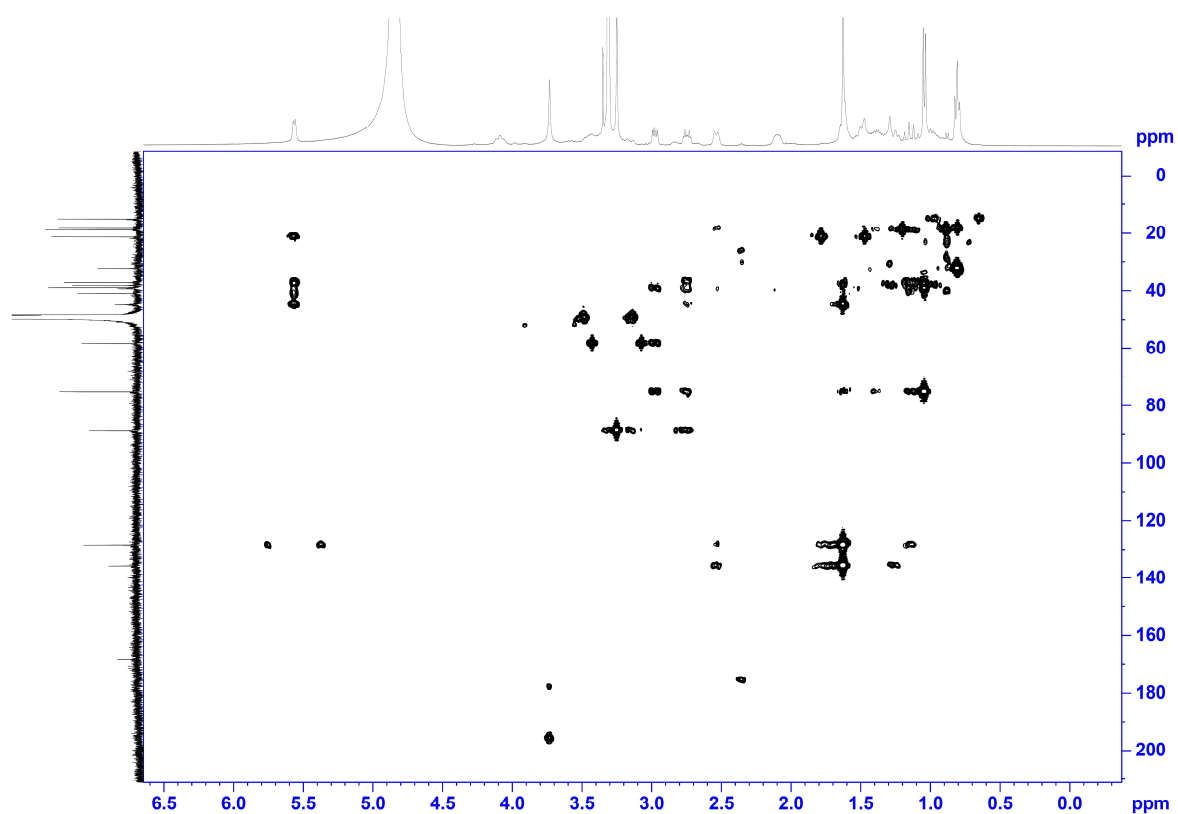

**Figure S25.** HMBC spectrum of tetramic acid 2.

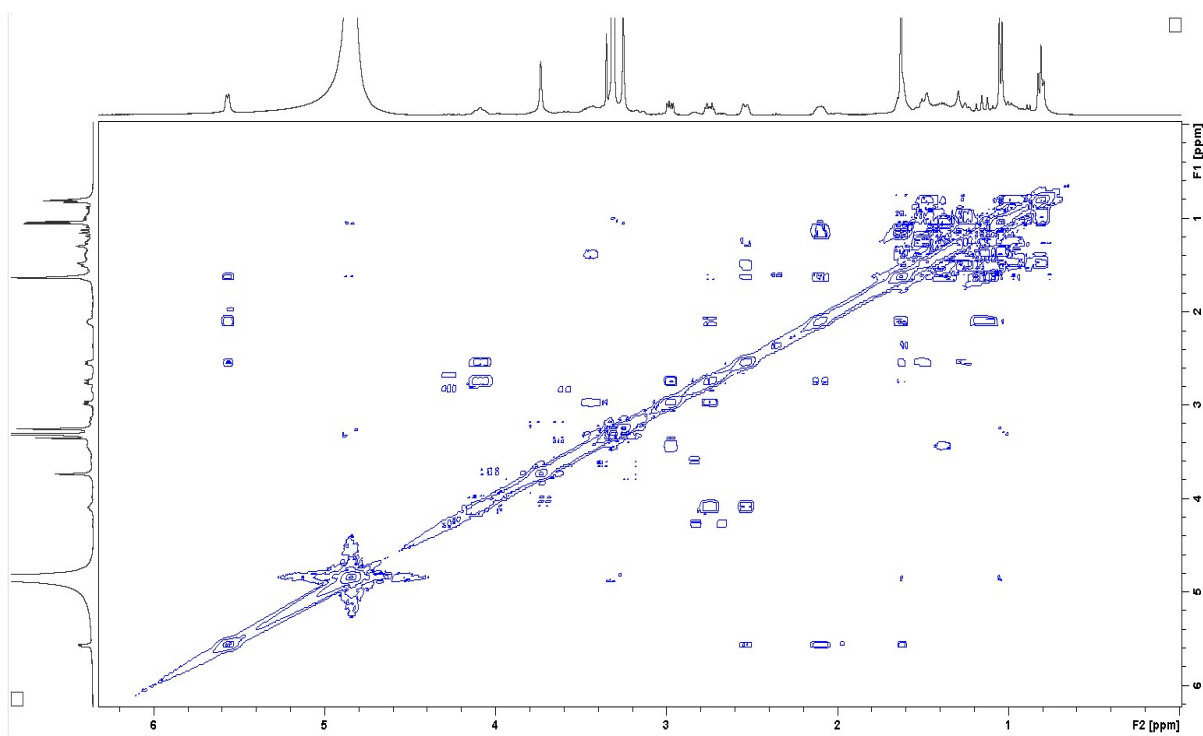

**Figure S26.** COSY spectrum of tetramic acid 2.

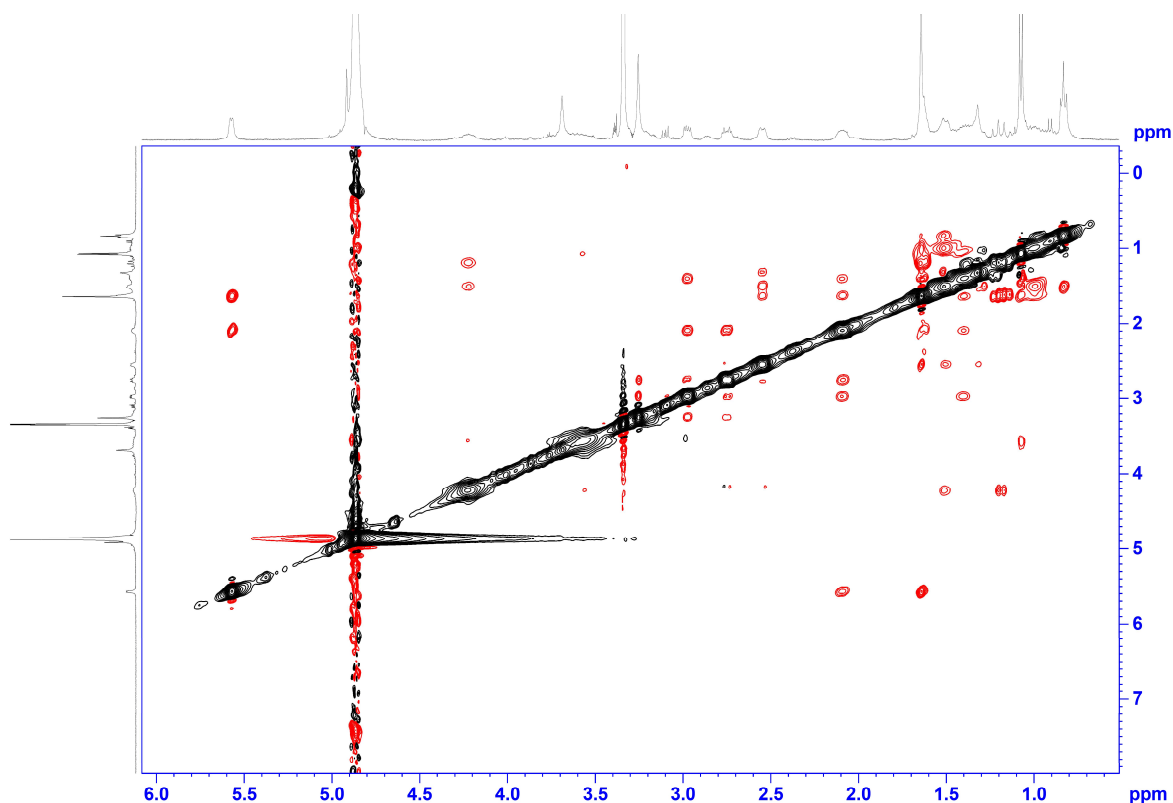

**Figure S27.** NOESY spectrum of tetramic acid **2**.

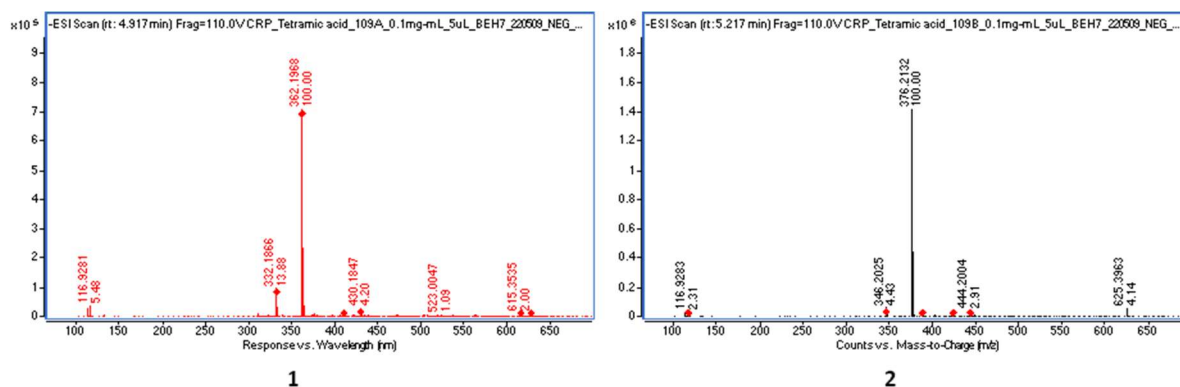

**Figure S28.** (–)-HRESIMS spectra of compounds **1** and **2**.

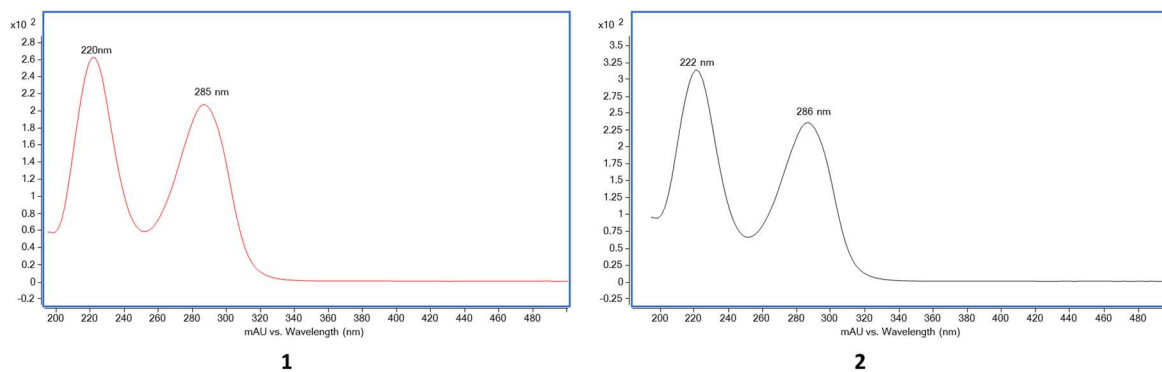

**Figure S29.** UV spectra of compounds **1** and **2**.



**A**

Inhibitory effect of Compound 1 against Antimicrobial assays

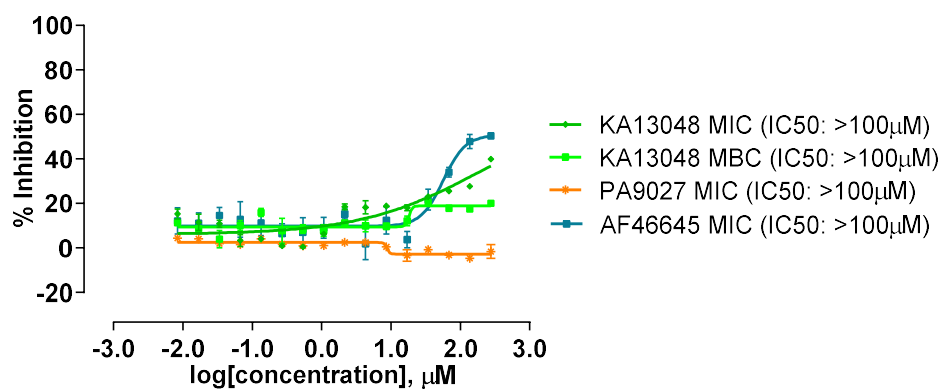**B**

Inhibitory effect of Compound 2 against Antimicrobial assays

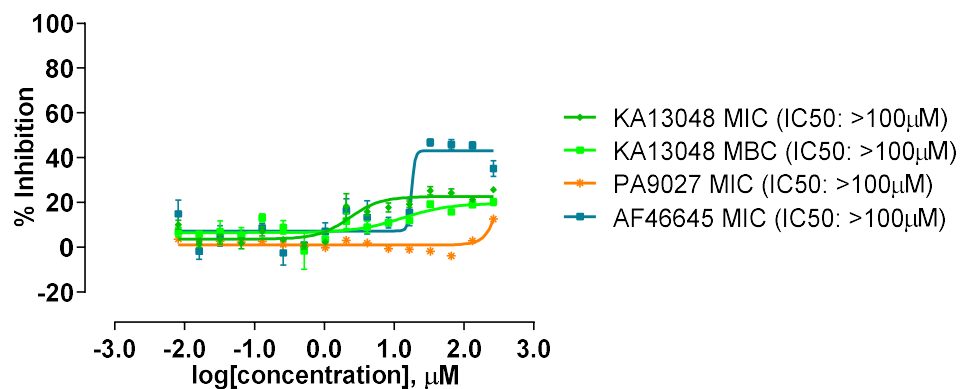

**Figure S30.** Dose response curve against *Klebsiella aerogenes* (ATCC® 13048™) (KA13048), *Pseudomonas aeruginosa* (ATCC® 9027™) (PA9027), *Aspergillus fumigatus* (ATCC® 46645™) (AF46645): **A**) Compound 1, **B**) Compound 2.

**A****Inhibitory effect of Compound 1 against *S. aureus* Rosenbach (ATCC® 25923™)**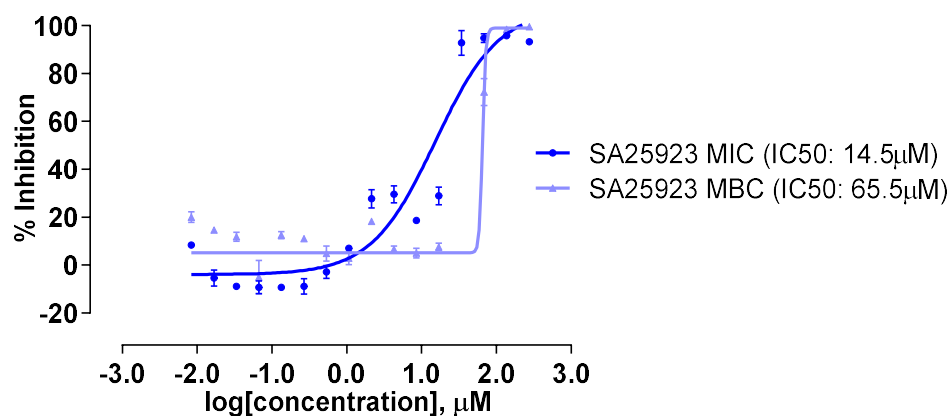**B****Inhibitory effect of Compound 2 against *S. aureus* Rosenbach (ATCC® 25923™)**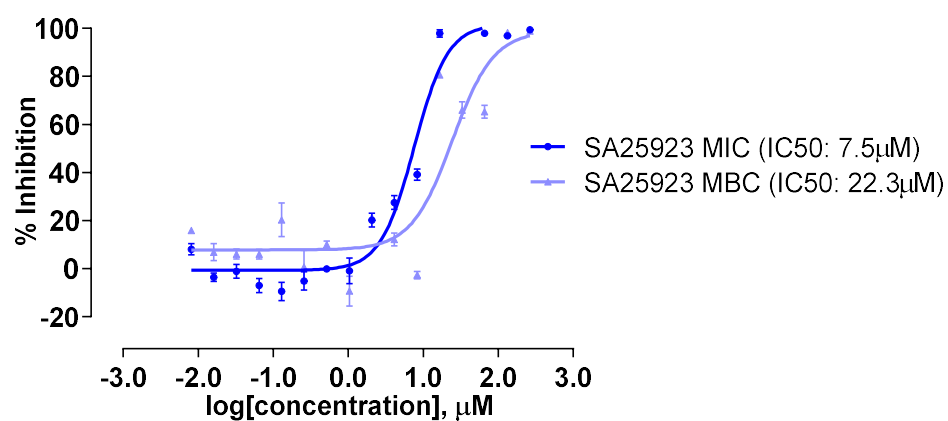

**Figure S31.** Dose response curve against *Staphylococcus aureus* Rosenbach (ATCC® 25923™) (SA25923), **A**) Compound 1, **B**) Compound 2.

**A****Inhibitory effect of Compound 1 against *A. baumannii* (ATCC® 19606™)**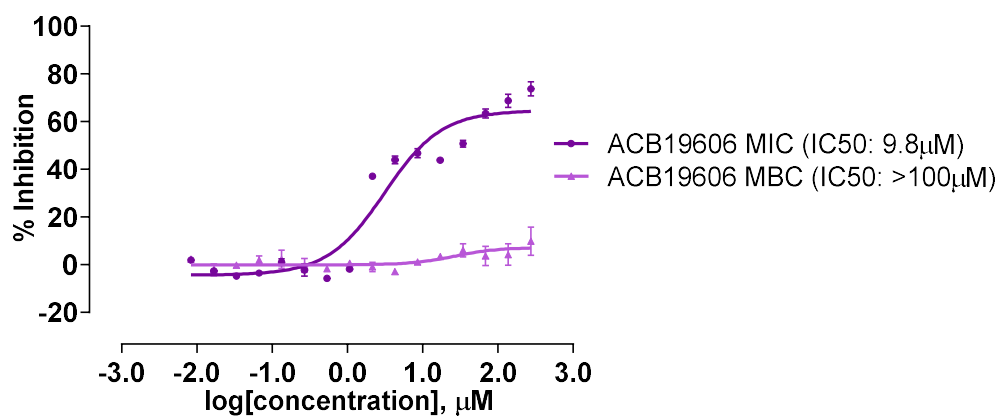**B****Inhibitory effect of Compound 2 against *A. baumannii* (ATCC® 19606™)**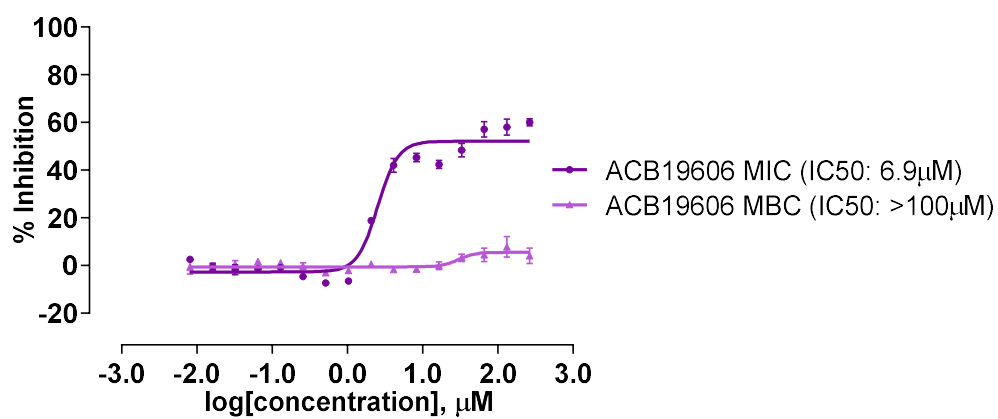

**Figure S32.** Dose response curve against *Acinetobacter baumannii* (ATCC® 19606™) (ACB19606), **A)** Compound 1, **B)** Compound 2.

**A****Inhibitory effect of Compound 1 against A549 (ATCC® CCL-185™)**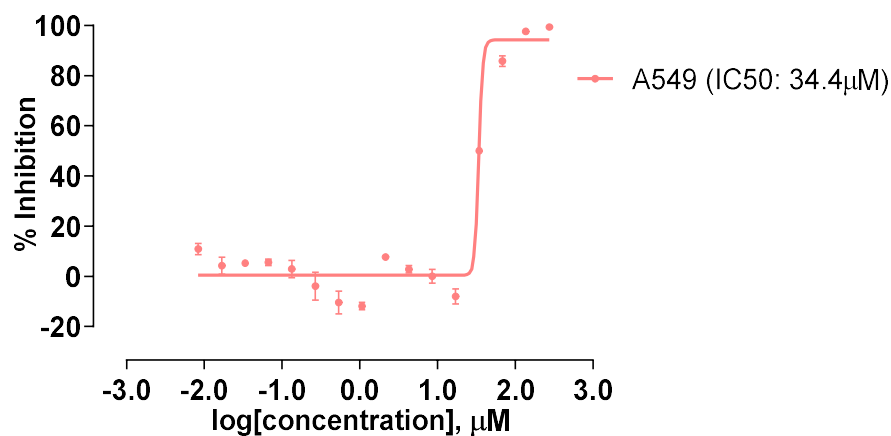**B****Inhibitory effect of Compound 2 against A549 (ATCC® CCL-185™)**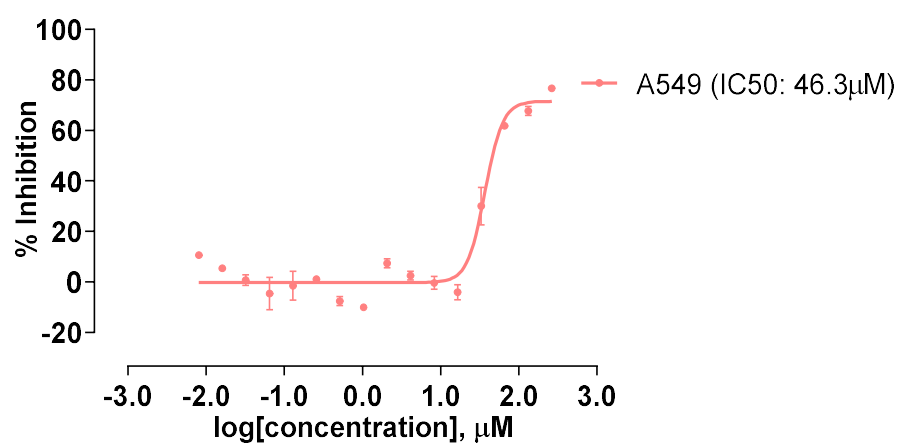

**Figure S33.** Dose response curve against the human lung carcinoma cells A549 (ATCC® CCL-185™) (A549), **A**) Compound 1, **B**) Compound 2.

**Table S10.** Bioactivity characterization of compounds BE-54476-A (1) and BE-54476-B (2)

| Target organism<br>(ATCC® number)                        | Compound 1 (BE-54476-A)  |                              | Compound 2 (BE-54476-B)  |                              |
|----------------------------------------------------------|--------------------------|------------------------------|--------------------------|------------------------------|
|                                                          | MIC <sup>a</sup><br>(µM) | MBC/MFC <sup>b</sup><br>(µM) | MIC <sup>a</sup><br>(µM) | MBC/MFC <sup>b</sup><br>(µM) |
| <i>Acinetobacter baumannii</i><br>(ATCC® 19606™)         | 9.8                      | >100                         | 6.9                      | >100                         |
| <i>Klebsiella aerogenes</i> (ATCC® 13048™)               | >100                     | >100                         | >100                     | >100                         |
| <i>Pseudomonas aeruginosa</i><br>(ATCC® 9027™)           | >100                     | -                            | >100                     | -                            |
| <i>Staphylococcus aureus</i> Rosenbach<br>(ATCC® 25923™) | 14.5                     | 65.5                         | 7.5                      | 22.3                         |
| <i>Aspergillus fumigatus</i> (ATCC® 46645™)              | >100                     | -                            | >100                     | -                            |
| Target cell line ATCC® number)                           | IC <sub>50</sub> (µM)    |                              |                          |                              |
| A549 Human lung carcinoma cells (ATCC® CCL-185™)         | 34.4                     |                              | 46.3                     |                              |

<sup>a</sup> Minimum inhibitory concentration IC<sub>50</sub> for microbial assay *Acinetobacter baumannii* (ATCC® 19606™), *Klebsiella aerogenes* (ATCC® 13048™), *Pseudomonas aeruginosa* (ATCC® 9027™), *Staphylococcus aureus* Rosenbach (ATCC® 25923™) and *Aspergillus fumigatus* (ATCC® 46645™). <sup>b</sup> Minimum bactericidal/fungicidal concentration IC<sub>50</sub> for microbial assay *Acinetobacter baumannii* (ATCC® 19606™), *Klebsiella aerogenes* (ATCC® 13048™), *Pseudomonas aeruginosa* (ATCC® 9027™), *Staphylococcus aureus* Rosenbach (ATCC® 25923™) and *Aspergillus fumigatus* (ATCC® 46645™).

### Nuclear magnetic resonance (NMR) information for surfactin analogs isolated from A1123 – A100141 mutant:

A1123 - A100141 mutant was fermented in CA10LB at 28 °C for 9 days shaking at 200 rpm with 50 mm throw. At the end of the incubation period, cultures were freeze dried and surfactin analogs were extracted via preparative high-performance liquid chromatography (prep-HPLC).

Proton ( $^1\text{H}$ ) and carbon ( $^{13}\text{C}$ ) nuclear magnetic resonance spectra were recorded on a Bruker Avance 400 spectrometer with CryoProbe at 400 MHz for  $^1\text{H}$  and 100 MHz for  $^{13}\text{C}$ . The chemical shifts are reported in parts per million (ppm) on the delta ( $\delta$ ) scale. NMR spectra recorded in  $\text{CD}_3\text{OD}$  were referenced to the central peak of the residual methanol quintet (3.31. ppm) for  $^1\text{H}$ , or the central peak of the residual methanol septet (49.00 ppm) for  $^{13}\text{C}$ . NMR spectra were processed using MestReNova 10.0.2

### [Leu<sup>7</sup>] surfactin iso-C14

Peptide sequence: N-Glu-Leu-D-Leu-Val-Asp-D-Leu-Leu-C

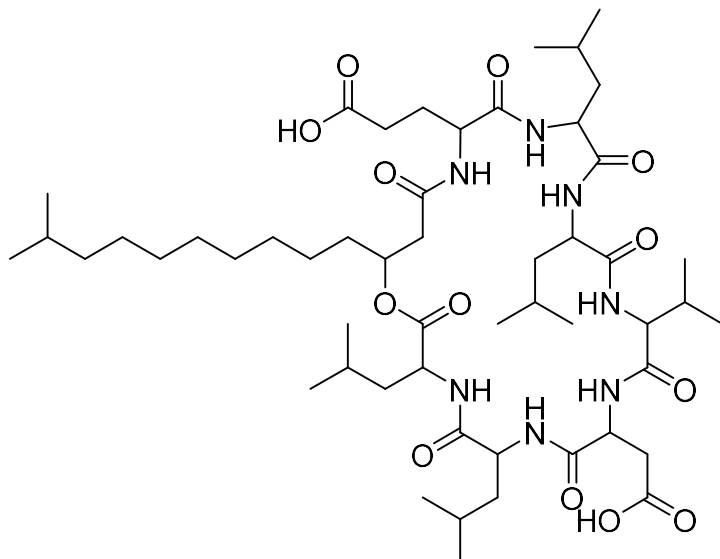

Chemical Formula:  $\text{C}_{52}\text{H}_{91}\text{N}_7\text{O}_{13}$

Exact Mass: 1021.66749

Molecular Weight: 1022.33600

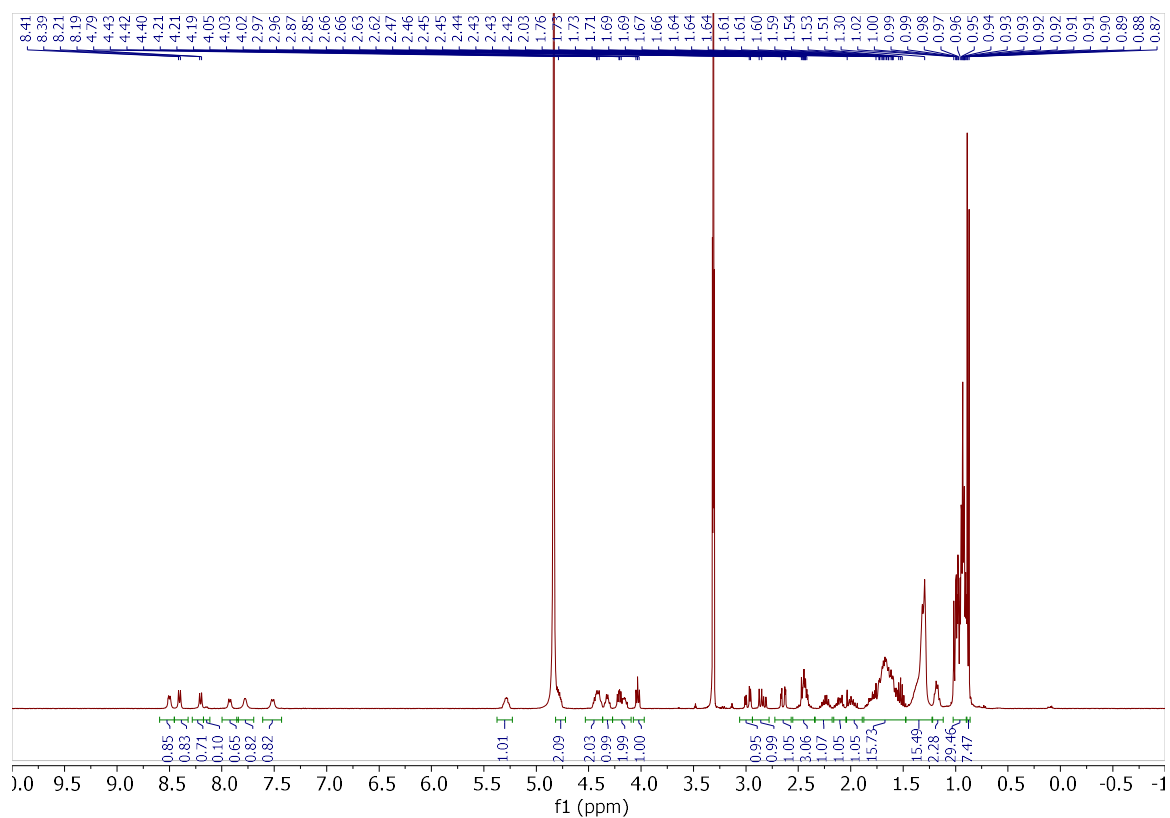

**Figure S34:**  $^1\text{H}$  NMR spectrum of [Leu<sup>7</sup>] surfactin iso-C14

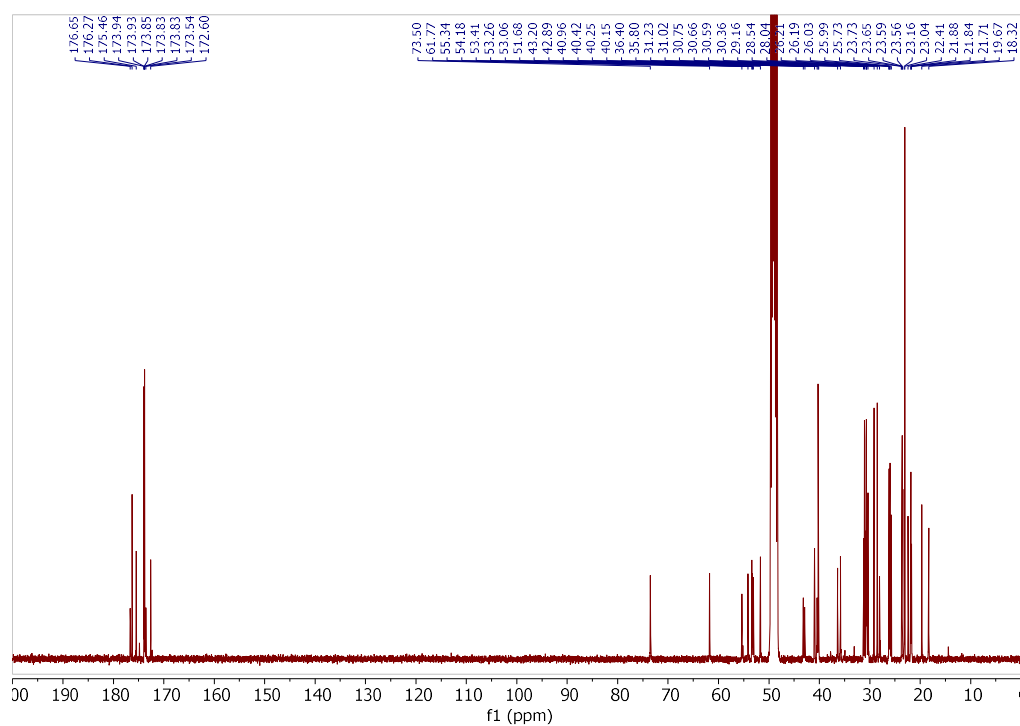

**Figure S35:**  $^{13}\text{C}$  NMR spectrum of [Leu<sup>7</sup>] surfactin iso-C14

**[Leu<sup>7</sup>] surfactin anteiso-C15**

Peptide sequence: N-Glu-Leu-D-Leu-Val-Asp-D-Leu-Leu-C

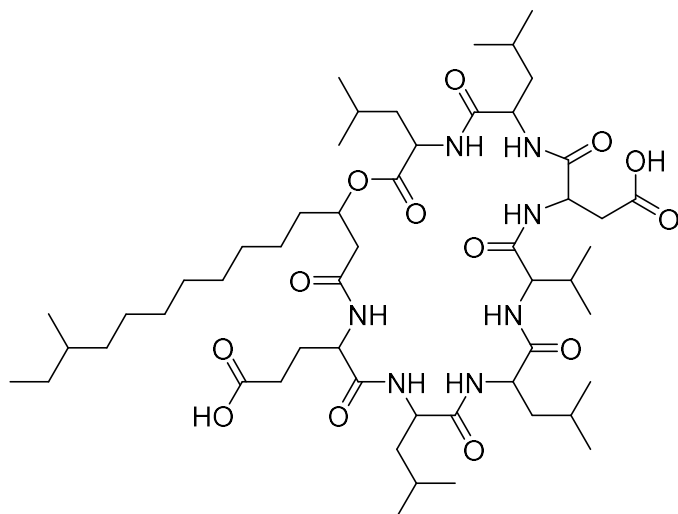

Chemical Formula: C<sub>53</sub>H<sub>93</sub>N<sub>7</sub>O<sub>13</sub>

Exact Mass: 1035.68

Molecular Weight: 1036.36

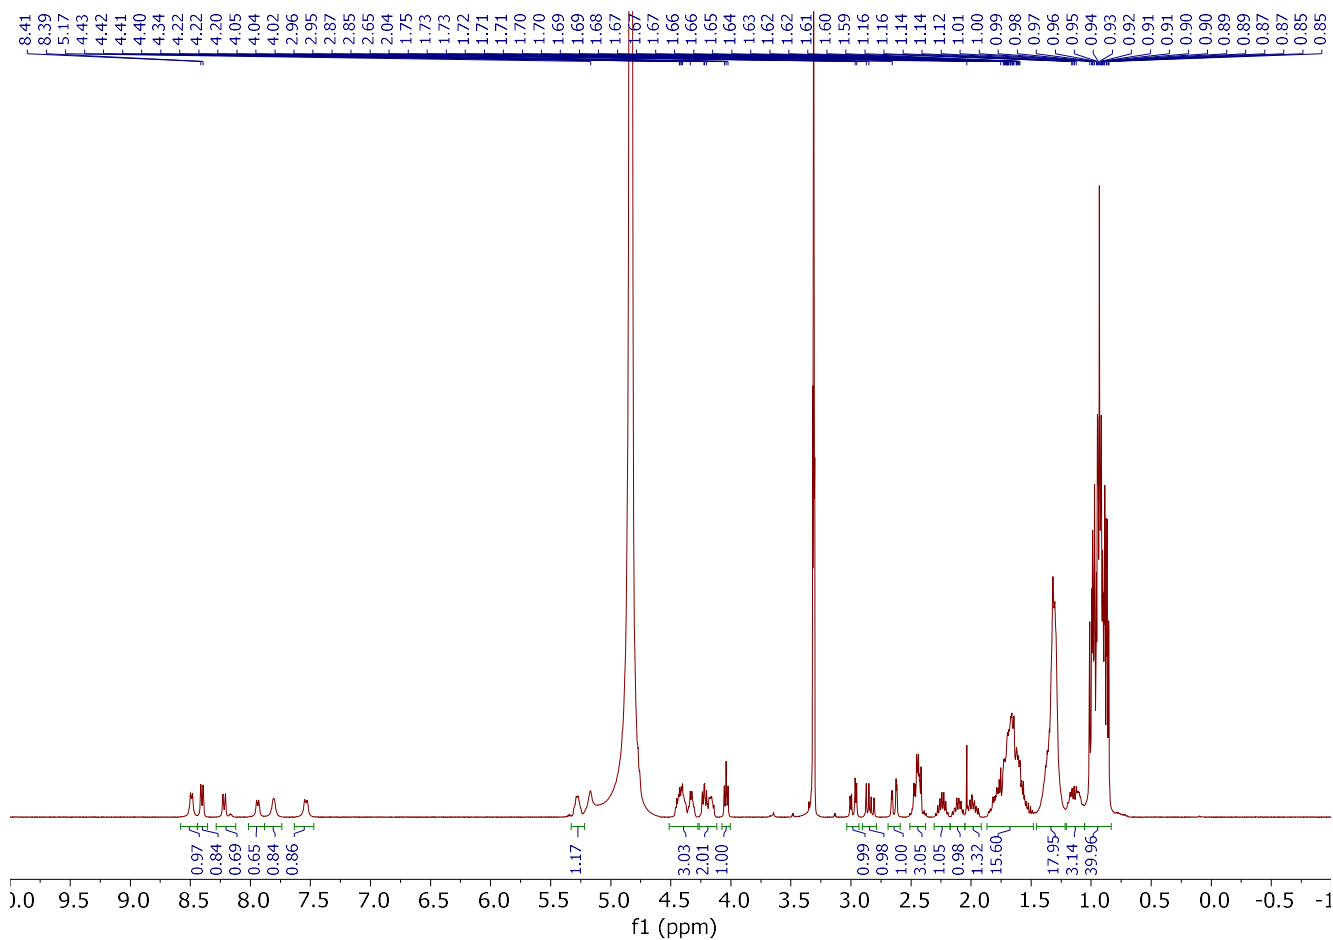

**Figure S36:** <sup>1</sup>H NMR spectrum of [Leu<sup>7</sup>] surfactin anteiso-C15



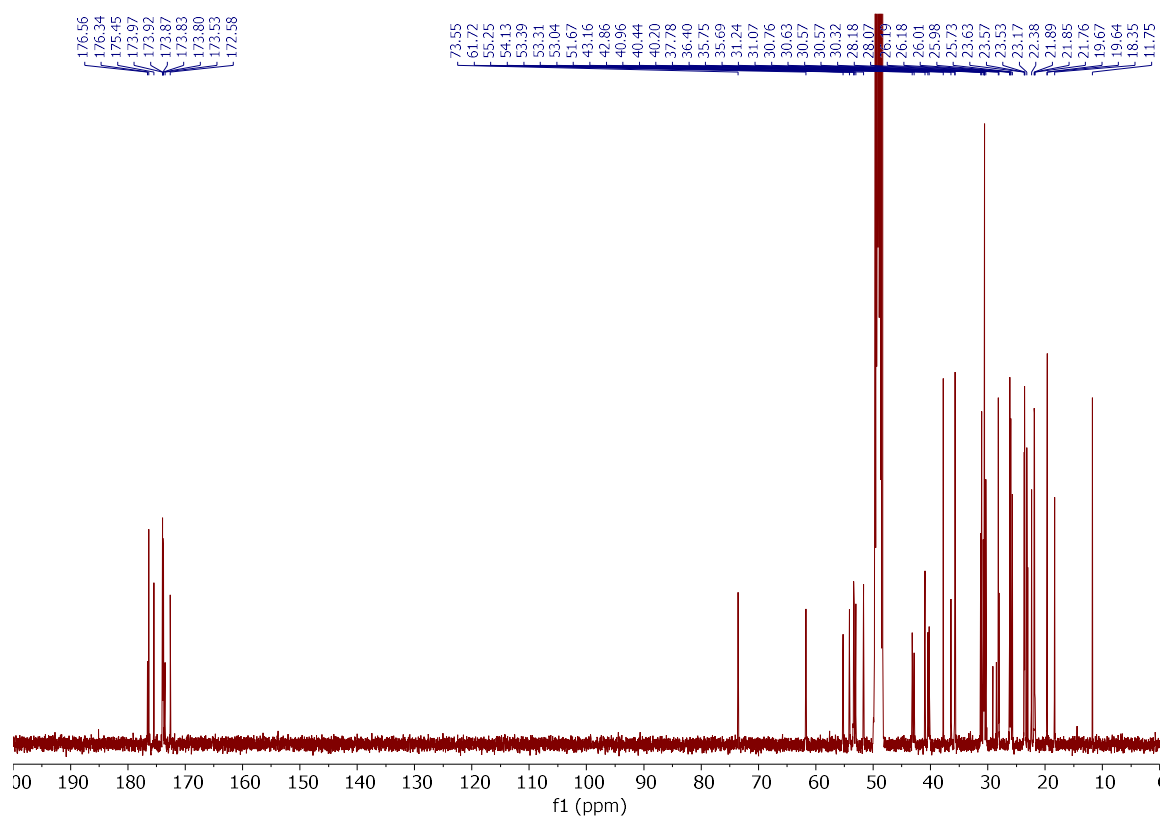

**Figure S37:** <sup>13</sup>C NMR spectrum of [Leu<sup>7</sup>] surfactin anteiso-C15

# [Leu<sup>7</sup>] surfactin iso-C15

Peptide sequence: N-Glu-Leu-D-Leu-Val-Asp-D-Leu-Leu-C

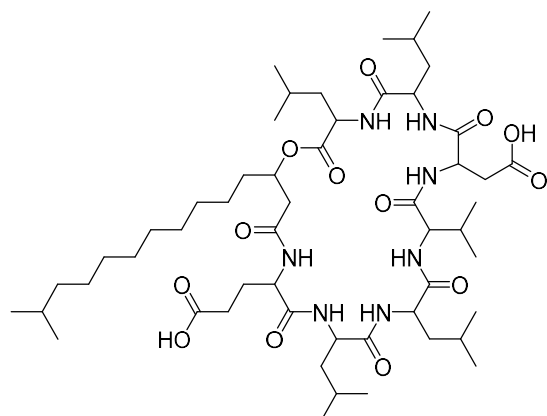

Chemical Formula: C<sub>53</sub>H<sub>93</sub>N<sub>7</sub>O<sub>13</sub>

Exact Mass: 1035.68

Molecular Weight: 1036.36

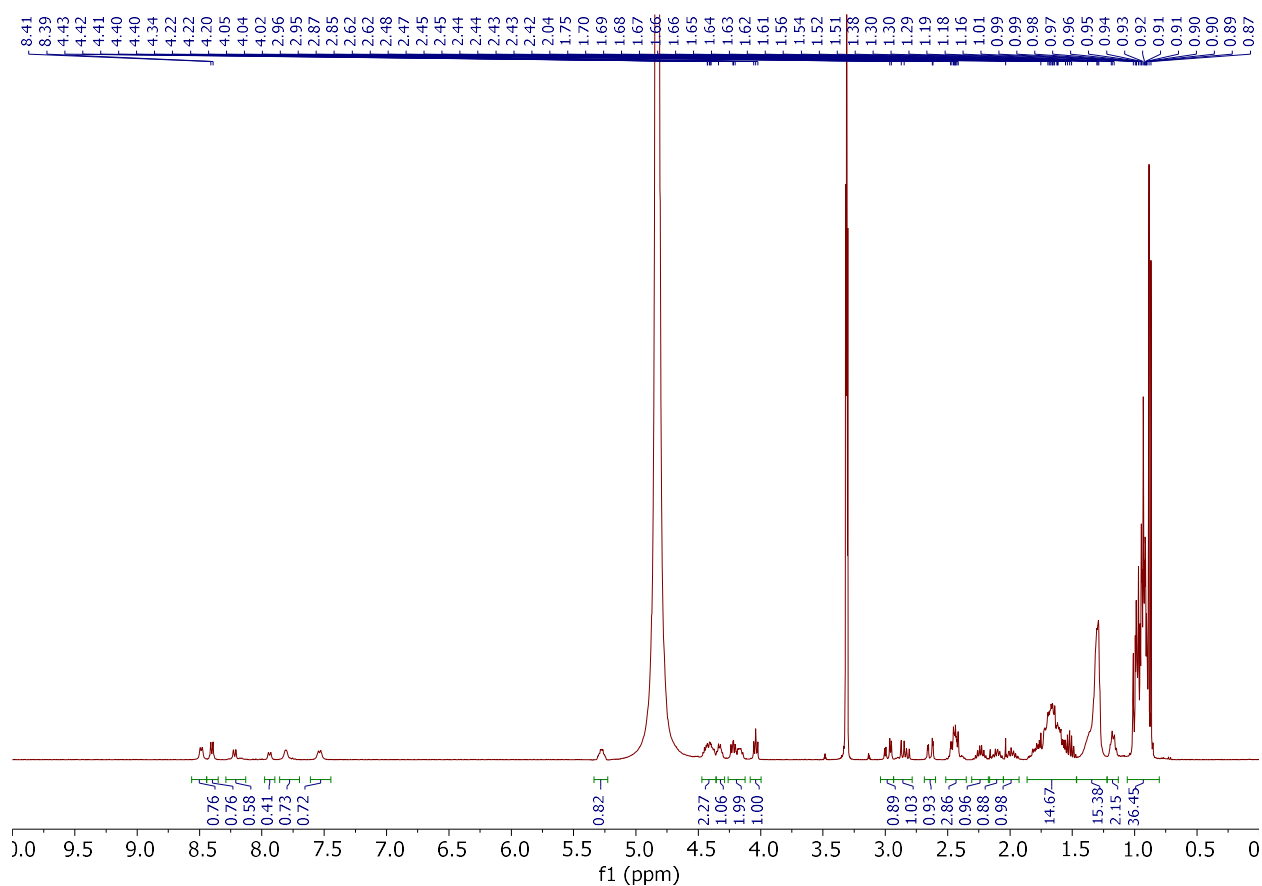

Figure S38: <sup>1</sup>H NMR spectrum of [Leu<sup>7</sup>] surfactin iso-C15

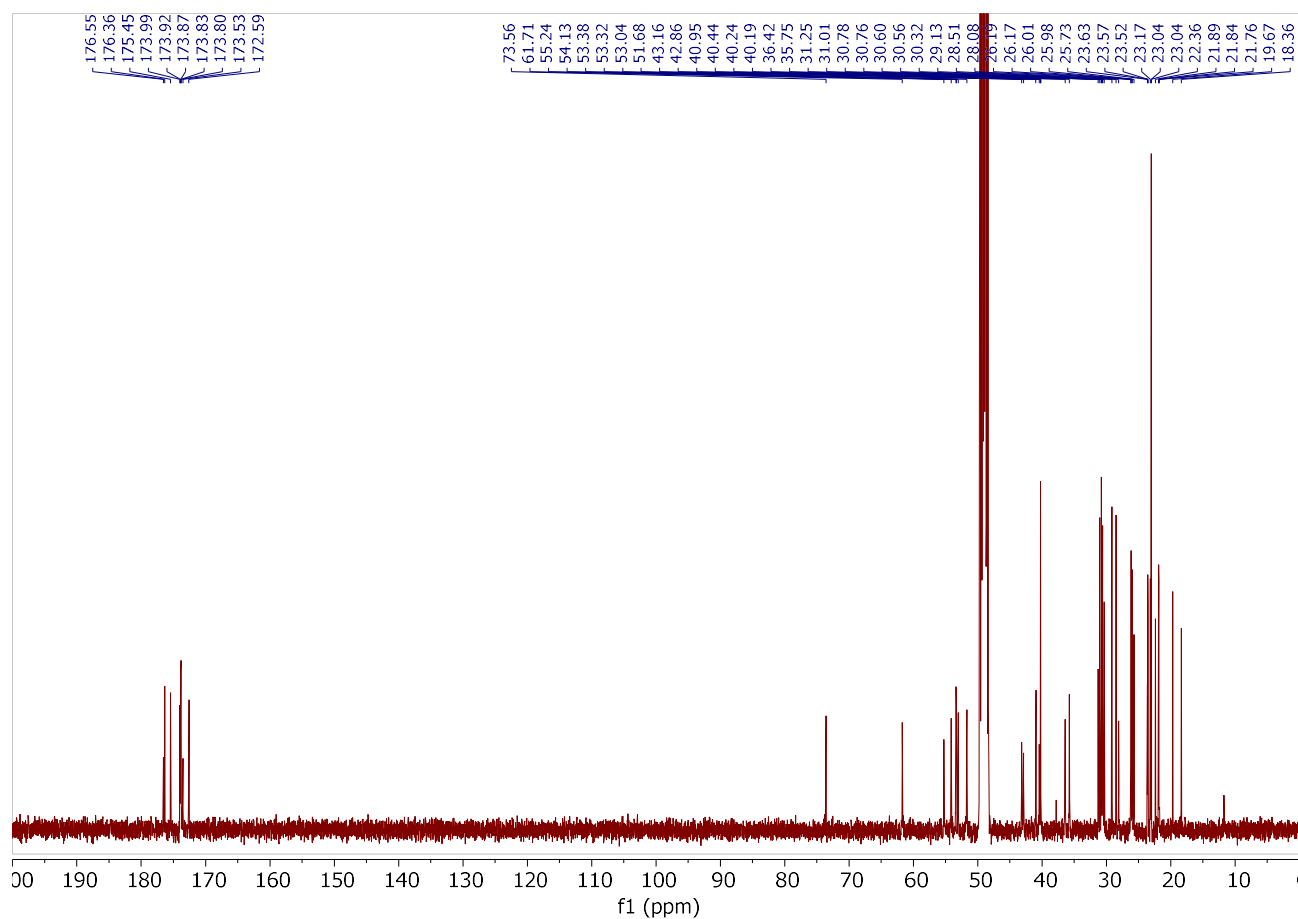

**Figure S39:** <sup>13</sup>C NMR spectrum of [Leu<sup>7</sup>] surfactin iso-C15

**Table S11.** Integration cassette sequences: *kasO*\*p is underlined

| Integration cassette          | Sequences (DNA)                                                                                                                                                                                                                                                                                                                                                                                                                                                                                                                                                                                                                                                                                                                                                                                                                                                                                                                                                                                                                                                                                                                                                                                                                                                                                                                                                                                                                                                                                                                                                                                                                                                         |
|-------------------------------|-------------------------------------------------------------------------------------------------------------------------------------------------------------------------------------------------------------------------------------------------------------------------------------------------------------------------------------------------------------------------------------------------------------------------------------------------------------------------------------------------------------------------------------------------------------------------------------------------------------------------------------------------------------------------------------------------------------------------------------------------------------------------------------------------------------------------------------------------------------------------------------------------------------------------------------------------------------------------------------------------------------------------------------------------------------------------------------------------------------------------------------------------------------------------------------------------------------------------------------------------------------------------------------------------------------------------------------------------------------------------------------------------------------------------------------------------------------------------------------------------------------------------------------------------------------------------------------------------------------------------------------------------------------------------|
| <i>kasO</i> *p-SCO2792 (AdpA) | <p> <u>TGTTACATTTCGAACGGTCTCTGCTTTGACAACATGCTGTGCGGT</u><br/> <u>GTTGTAAAGTCGTGGCCAGGAGAATACGACAGCGTGCAGGACTG</u><br/> GGGGAGTTATGAGCCACGACTCCACCGCCGCGCCGGAAGCCGC<br/> GGCCCGGAAGCTGTCCGGGCGACGCCGCAAGGAGATCGTCGCG<br/> GTGCTGCTGTTTCAGCGGCGGCCCCATCTTCGAGAGTTCCATACC<br/> GCTGTCGGTGTTTCGGGATCGACCGCCAGGACGCCGGCGTGCCG<br/> CGTACCGGCTGCTGGTGTGCGCCGGCGAGGACGGCCCGCTGC<br/> GGACCACGGGGGGCCTGGAACACCGCGCCGCAGGGAAGTGG<br/> AGGCGATCTCGCGCGCGGGCACGGTCGTCTGTCGGCGCCTGGC<br/> GGTCGATCACCTCGCCGCCGCGGAGGAAGCACTCGACGCACT<br/> GCGCAGGGCGCACGAGGAGGGGGCGCGCATAGTCGGAAGTGTG<br/> CACGGGCGCCTTCGTCTCGCGGCGGCCGGCCTGTTGGACGGC<br/> CGCCCCGCCACACGCACTGGATGTACGCGCCGACGCTGGCCA<br/> AGCGCTATCCGTCCGTGCACGTGACCCGCGCGAACTCTTCGTG<br/> GACGACGGCGACGTGCTGACGTCCGCGGCGACCGCGGCCGGG<br/> ATCGACCTGTGCCTGCACATCGTGCGCACGGACACGGCAACGA<br/> GGCGGCCGGTGCGCTGGCCCGCCGGCTGGTGGTCCCCCGCG<br/> CCGCAGCGGCGGCCAGGAGCGCTACCTCGACAGGTCTTTACCG<br/> GAGGAGATCGGCGCCGACCCGCTCGCCGAGGTCGTGCGCTGG<br/> CGCTGGAGCACCTCCACGAGCAGTTTCGACGTGGAGACGCTGGC<br/> CGCGCGCGCCTACATGAGCCGCCGCACCTTCGACCGCCGGTTC<br/> CGCTCGCTGACGGGCGAGCGCCCCGCTCCAGTGGCTGATCACCC<br/> AGCGGGTGCTCCAGGCGCAGCGCCTGCTGGAGACGTCCGACTA<br/> CTCGGTGGACGAGGTCGCCGGGCGCTGCGGCTTCCGCTCCCCG<br/> GTGGCCCTGCGCGGCCACTTCCGCCGCCAGCTGGGCTCGTCCC<br/> CGGCCGCTACCGGGCGGCCTACCGGGCGCGCCGTCCCCAGG<br/> GCGACCGCCAGCCGGACCCGGACACCGCAGCCGCGGGCGCCA<br/> CCCGCCCGCTGCCCCCGTCCGACCCGCCGGCCTCCCTCGCCCC<br/> GGAGAACGCGGTCCCGTTCCAGACCCGCCGCACCGCCACCCCG<br/> ATGCCGCGGGGCGCGGCCAGCGTCCCGGGCCAGCGCAGCGCG<br/> CCGTGAGGTGAGCAGACGGCTCCCTCGAACGCCGGACGGGCCG<br/> GAGCGTGCCCGTCCGGCGTTCCCGTCCGGTGCCGGGCGGGGC<br/> ACACTCAGCCCGTCCGGCGTTCA </p> |
| <i>kasO</i> *p -SCO3571 (Crp) | <p> <u>TGTTACATTTCGAACGGTCTCTGCTTTGACAACATGCTGTGCGGT</u><br/> <u>GTTGTAAAGTCGTGGCCAGGAGAATACGACAGCGTGCAGGACTG</u><br/> GGGGAGTTATGGACGACGTTCTGCGGCGCAACCCGCTCTTCGC<br/> GGCGCTCGACGACGAGCAATCCGCGGAGCTCCGCGCCTCCATG<br/> AGTGAGGTGACCCTCGCCCGCGGCGACACCCTGTTCCACGAGG<br/> GGGACCCCGGAGACCGCCTCTACGTGGTCACGGAAGGCAAGGT<br/> CAAGCTCCACCGCACGTCCCCGACGGGCGCGAGAACATGCTG<br/> GCCGTGCTCGGCCCCAGCGAGCTGATCGGCGAGCTGTGCTCT<br/> TCGACCCGGGCCCGCGCACGGCGACCGGCACCGCGCTGACCG<br/> AGGTCAAGCTGCTCGCCCTCGGCCACGGCGACCTCCAGCCCTG<br/> GCTGAACGTCCGCCCCGAGGTGGCCACCGCGCTGCTGCGCGCC<br/> GTCGCGCGCCGCTGCGCAAGACCAACGACGCCATGTGCGACC </p>                                                                                                                                                                                                                                                                                                                                                                                                                                                                                                                                                                                                                                                                                                                                                                                                                                                                                                                                                                                                                                            |

|                                           |                                                                                                                                                                                                                                                                                                                                                                                                                                                                                                                                                                                                                                                                                                                                                                                                                                                                                                                                                                                                                                                                                                                                                                                                                                                                                                                                                                                                                                                                                                                                                                                                                                                                                                                                                                                                                                                                                                                                                                                                                                                                                                                                                                                                                                                                                       |
|-------------------------------------------|---------------------------------------------------------------------------------------------------------------------------------------------------------------------------------------------------------------------------------------------------------------------------------------------------------------------------------------------------------------------------------------------------------------------------------------------------------------------------------------------------------------------------------------------------------------------------------------------------------------------------------------------------------------------------------------------------------------------------------------------------------------------------------------------------------------------------------------------------------------------------------------------------------------------------------------------------------------------------------------------------------------------------------------------------------------------------------------------------------------------------------------------------------------------------------------------------------------------------------------------------------------------------------------------------------------------------------------------------------------------------------------------------------------------------------------------------------------------------------------------------------------------------------------------------------------------------------------------------------------------------------------------------------------------------------------------------------------------------------------------------------------------------------------------------------------------------------------------------------------------------------------------------------------------------------------------------------------------------------------------------------------------------------------------------------------------------------------------------------------------------------------------------------------------------------------------------------------------------------------------------------------------------------------|
|                                           | <p>TGGTCTTCTCGGACGTTCCCGGCCGTGTCGCCCGCGCCCTGCTC<br/> GACCTCTCCCGCCGCTTCGGCGTGACGTCGGAGGAGGGCATCC<br/> ACGTGGTGCACGACCTGACGCAGGAGGAGCTGGCCCAGCTGGT<br/> CGGCGCGTCCCGCGAGACGGTCAACAAGGCGCTGGCGGACTTC<br/> GCCCAGCGCGGCTGGCTCCGCCTGGAGGCCCGCGCGGTGATC<br/> CTCCTGGACGTGGAGCGACTGGCCAAGCGCTCCCGCTGA</p>                                                                                                                                                                                                                                                                                                                                                                                                                                                                                                                                                                                                                                                                                                                                                                                                                                                                                                                                                                                                                                                                                                                                                                                                                                                                                                                                                                                                                                                                                                                                                                                                                                                                                                                                                                                                                                                                                                                                                                                   |
| <i>kasO</i> <sup>*p</sup> -SCO4069 (SarA) | <p><u>TGTTACATTTCGAACGGTCTCTGCTTTGACAACATGCTGTGCGGT</u><br/> <u>GTTGTAAAGTCGTGGCCAGGAGAATACGACAGCGTGACGAGCTG</u><br/> <u>GGGGAGTTATGACCGGTATCGGTGGTGTGGAGATGGGTGCTCA</u><br/> GGCCGCGCGTGCCCGGGCACTGGCGGTGCTGCGGGTCCGCAG<br/> CCGCGCGCTGGCCGTGGCCCTGCTGCCCGCCGCGCGTCGCCGT<br/> GATCCTCCTCGTCGGCGGGCTCCACCGGGCACCTGGCGGGCGCC<br/> GCCTGGGACGTCTGCGCTGGGTGCTGTCCGTCTCGCGCTGC<br/> TCGTCTGCTGGCCGCCGCGGAGTCGCCCTGGTCGTGGCCCG<br/> CTCCCGGCCCGCCGTGACCCCCACGGTCACGGTCGCCGAGGAG<br/> TCGGCGCCCGACCTCTACCGGATGGTGCGCGACCTGGCCGACC<br/> GCCTCGACGTCCCCGCCCCCTCCGCGATAGCGCTCACCCCGGA<br/> CTGCGACAGCTGGCTGGAGGACCGCACCCACCCGGCCACGGC<br/> CCGCCCCCGGGCGAGCGGCACGACGACGACCCGGCCGGCCTG<br/> AGCGGCCCGGCCACCGCCGGAGCCCGGCCGCGCGCCCGTC<br/> CTGGTCATCGGCTCACCGTTCCTGTGGTGGATGCGGGTGGGCG<br/> AGCTGCGCGCCGTCTCGCCCCGGTCGTGCGCGGTACGGGGCC<br/> CTCGGCGCACCCCGACATAGCCGCGGCCGGCGTTTCATACGG<br/> GGCCTGGACGCCGCGGTGGCGGTGGCCTCGGCAGGCCGACGA<br/> GATCCGCTGTCCCGCGTGGCGTGCGCGGGCCTCGGCTGGGCGT<br/> CCCGGCTGCTGCTGCGCGGTTGCCGGGATCACGCGACCGAGAT<br/> GGAGCGCGGGGTGCGGGCCGCGGCCGCGAGCGTGACAGGC<br/> TGTGGACTACGGTCTGCGGATCGTCGCGCAGGAGCAGGTCGGG<br/> CTCGCGTACGCGGGCTGGGACCGGCTGCTGACCCGGGTGGCG<br/> CTGCCGGCCTGGCGGATGGGCCGCTGGCCCTCCCGGCTGGAC<br/> GTCGGTGTGTCGCGCCCTCACGGAGCTGTCGCGCCGGGACC<br/> GCCTGGCCGAGGGCTTCGCCTCCCGCCTCGGCGAGCGCCCCGC<br/> CTGTGACCTGCTGGAGGAGCCCGGGGTGATGGACGAGGCGGTC<br/> TCGCTCCTCGCCGCGCGTCTGTTCCACGGCGGGGCCCGCGAGA<br/> CCGGCCCCGACTGGTCGCCGGTGGGGTGGGACGAGTATCCCGA<br/> GGAGGTCGTCGACCGGACCTGGCGCACGGACGCGGCCCGCCT<br/> GCACCGCGTGCTGGACACCCTGGGCGTCCGCCGCGCCGCGG<br/> GGGCGTCGCTCCGGGCACGGACGGCCCGACCCTGGCCCCGCT<br/> CCTGGACCACCTACGACCCCGGACAACGCGGTACCGTCCCC<br/> CCTGTCACCGGTGCCGGCACCGGCACCGAGGCGGCCGGCGAG<br/> GCACGGACGGAGGCATCGGCCGGGGGCGGCACCCCGCATCCA<br/> CACGTGCCGTACGCGGACGACGAAGCCCCGCATGCGCCGTACG<br/> CGGACGACGAAGCCCTGCACGTGCCGGACGCCGACGACGAAGC<br/> CCCACATGCGCCGTACGCCGACCACGCCGACCACGCCGCCTAC<br/> GACGAGGGCGACGAGGACGACGAGGACGATCTCGCCGGCACCA<br/> CCGCCCGTGGCGCCGCCCTGGCCGCCGGGCTCAGCGCGCAGC<br/> TGGCCCGCGAGGAGGCTCGGGCGCGGCCCGACGCGGCCGGG<br/> CCACGTGCTGACTCCGCAACCGGGAGCCGGAGCCGGTCCCGA<br/> CGCGGCCCTCTGGGACGACCGCGTGCTCCCCCTCCTCCCGCTT<br/> CAGCCCCCGCGCACCGGGCGCGAGATCCTACCGCGCACATCA<br/> CCGCGATGGTGTGCTGCGCGGCGATGGACACCGCCGGGGCGG</p> |

|                                      |                                                                                                                                                                                                                                                                                                                                                                                                                                                                                                                                                                                                                                                                                                                                                                                                                                                                                                                                                                                                                                                                                                                                                                                                                                                                                                                                                                                                                                                                                                                                                                                                                                                                                                                                                                                                                                                                                                                                                                |
|--------------------------------------|----------------------------------------------------------------------------------------------------------------------------------------------------------------------------------------------------------------------------------------------------------------------------------------------------------------------------------------------------------------------------------------------------------------------------------------------------------------------------------------------------------------------------------------------------------------------------------------------------------------------------------------------------------------------------------------------------------------------------------------------------------------------------------------------------------------------------------------------------------------------------------------------------------------------------------------------------------------------------------------------------------------------------------------------------------------------------------------------------------------------------------------------------------------------------------------------------------------------------------------------------------------------------------------------------------------------------------------------------------------------------------------------------------------------------------------------------------------------------------------------------------------------------------------------------------------------------------------------------------------------------------------------------------------------------------------------------------------------------------------------------------------------------------------------------------------------------------------------------------------------------------------------------------------------------------------------------------------|
|                                      | CCCCCGGCTCGACTGGCTCGACGGGGCCCTCGCTGCTGTTCTGA<br>CGGCGCCCCGACCGCGGACCTGGCGCCCAGCGTGCTCAGCCTC<br>GTCGAGACCGGCGACCCGGGGCCGCTGCGCGCCTGGATGACC<br>GACCTCGGCATACGTCCCGAGAAGCCGGTGCGTCTGGTCTGA                                                                                                                                                                                                                                                                                                                                                                                                                                                                                                                                                                                                                                                                                                                                                                                                                                                                                                                                                                                                                                                                                                                                                                                                                                                                                                                                                                                                                                                                                                                                                                                                                                                                                                                                                                        |
| <i>kasO</i> *p - SCO6196 (FAS)       | <u>TGTTACATTCTGAACGGTCTCTGCTTTGACAACATGCTGTGCGGT</u><br><u>GTTGTAAAGTCGTGGCCAGGAGAATACGACAGCGTGCAAGGACTG</u><br><u>GGGGAGTTATGACCGCACCCGCGCCCCAGCCGTCGTACGCGCA</u><br>CGGCACCAGCACCAACCCGCTGCTCGGCGACACCGTCGGCGCC<br>AACCTCGGCCGCGCGATCGCCGCCACCCGGACCGCGAGGCC<br>TCGTGACGTCCCGTCCGGACGGCGCTGGACCTACGCCGAGTT<br>CGGCGCCGCGCTCGACGAGCTGGCCCGGGGGCTGCTCGCGAA<br>GGGCGTCACCAGGGGCGACCGGGTCGGCATCTGGGCGGTCAAC<br>TGCCCCGAGTGGGTCTCTGTCAGTACGCCACCGCCCGCATCG<br>GCGTCATCATGGTGAACGTCAACCCGGCCTACCGGGCCCACTGA<br>GTTGGAGTACGTTCTCCAGCAGTCCGGCATCAGCCTGCTGGTCG<br>CCTCCCTCGCCCACAAGAGCAGCGACTACCGGGCGATCGTGGA<br>GCAGGTCCGCGGCCGCTGCCCGCGCTGCGCGAGACCGTCTAC<br>ATCGGCGACCGGTCTCTGGGACGCGCTCACCGCGGGCGCCGCC<br>GCGGTGGAGCAGGACCGGGTCGACGCCCTCGCCGCCGAACCTGA<br>GCTGCGACGACCCGGTCAACATCCAGTACACCTCCGGCACCACT<br>GGCTTCCCAAGGGCGCCACCCTCTCCACCACAACATCCTCAA<br>CAACGGCTACTGGGTGGGCGCACGGTCGGCTACACGGAGCAG<br>GACCGGGTCTGTCTGCCGGTGCCCTTTTATCACTGCTTTGGCAT<br>GGTGATGGGGAATCTGGGTGCCACCTCCACGGCGCCTGCATC<br>GTCATCCCCGCCCCGTCTCCGAGCCGGCGGCCACGCTGGAGG<br>CGGTGCAGCGGGAGCGGTGCACGTCCCTGTACGGCGTCCCGAC<br>CATGTTTCATCGCGGAGCTGAACCTGCCGGACTTCGCCTCCTACG<br>ACCTCACCTCCCTGCGCACCGGCATCATGGCGGGCTCGCCCTG<br>CCCGGTGGAGGTGATGAAGCGGGTGGTCGCCGAGATGCACATG<br>GAGCAGGTCTCCATCTGCTACGGCATGACCGAGACCTCCCCGGT<br>CTCCCTGCAGACCCGCATGGACGACGACCTCGAACACCGCACCC<br>GGCACCGTCGGCCGCGTCCTGCCGCACATCGAGGTCAAGGTCTG<br>TCGACCCGGTCACCGCGTGACCCTGCCGCGCGGCGAGGCGG<br>GCGAACTGCGCACCCGCGGCTACAGCGTGATGCTCGGCTACTG<br>GGAGGAGCCCGGAAGACCGCCGAGGCCATCGACCCGGGCCG<br>CTGGATGCACACCGGGGACCTCGCGGTGATGCGCGAGGACGGA<br>TACGTCGAGATCGTCGGCCGCATCAAGGACATGATCATCCGGGG<br>CGGCGAGAACATCTACCCGCGCGAGGTGAGGAGTTCTGTAC<br>GCCACCCGAAGATCGCGGACGTCCAGGTCTGCGCGTCCCGC<br>ACGAACGCTACGGCGAGGAGGTCTTGGCCTGCGTCGTGCG<br>CGATGCCGCCGACCCGCTCACCTGGAGGAACTGCGCGCCTAC<br>TGCGCCGGGCGAGCTCGCCCACTACAAGGTGCCAGCCGCTCC<br>AGCTCCTCGACTCCTTCCCGATGACCGTCTCGGGGAAGGTGCGC<br>AAGGTGGAGTTGCGGGAGCGGTACGGAGCGCGCCCCTGA |
| <i>kasO</i> *p - SLIV09220<br>(RedD) | <u>TGTTACATTCTGAACGGTCTCTGCTTTGACAACATGCTGTGCGGT</u><br><u>GTTGTAAAGTCGTGGCCAGGAGAATACGACAGCGTGCAAGGACTG</u><br><u>GGGGAGTTATGACGGGTGGGGGAGTGCTTGCCACGATGGACCC</u><br>GGTTCGAAAACCTGGTCCGGAGCCAGCCAAAGATCGGGCGGCAC<br>CCCGTCGCGGCCGCGTCAGGACGGCCGCGACCGGCACCCCATCC<br>GTCATGGGAGTGCGGAGAACGCGCGAGGACGGCCCGGACCG                                                                                                                                                                                                                                                                                                                                                                                                                                                                                                                                                                                                                                                                                                                                                                                                                                                                                                                                                                                                                                                                                                                                                                                                                                                                                                                                                                                                                                                                                                                                                                                                                                                |

|  |                                                                                                                                                                                                                                                                                                                                                                                                                                                                                                                                                                                                                                                                                                                                                                                                                                                                                                                                                                                                      |
|--|------------------------------------------------------------------------------------------------------------------------------------------------------------------------------------------------------------------------------------------------------------------------------------------------------------------------------------------------------------------------------------------------------------------------------------------------------------------------------------------------------------------------------------------------------------------------------------------------------------------------------------------------------------------------------------------------------------------------------------------------------------------------------------------------------------------------------------------------------------------------------------------------------------------------------------------------------------------------------------------------------|
|  | GCAGGACGGTCGGCCGCGCGGGCCGACCCCTCGGACCACGGAC<br>CCAGCCTGTACAACTTCGGGGGATGCGTGGAATCAACATATTG<br>GGACCCGTATCGATCGACACGTCGCACAGCGGGCGGGCATCC<br>GGGCCGGCAAGGTCCGTACGCTGGTGGCGACGCTCGCCATCGA<br>CGCGGGCCGCGCCGTGTCGCTCGCGGACCTGGTGGACGAACTG<br>TGGGGCGCGACCCCGCCCGACAACGTCCTCAACGCCCTCCAGG<br>CGCATGCCGCTCGGGCCCGGAAAGTGCTCAACGAGCGTGCCTG<br>CCCCGAGCGGGCGGGCGGCATCCTGCGTTCCGTGCTCGGCGG<br>CTACCTGCTGGAGATCGACCCGCAGTGCGTGAGCGGCAACCGC<br>TTCCTGAGACTCGTCTCGCAGGGCGCCGCCCTGCTCCCCGCCG<br>ACCCACGCGCGCCGTGAACTGCTGGAGACCGGTCTGCGGCT<br>GTGGCGCGGGCCCGCCCTCATCGACGCGGGCGAGGGCAGGCG<br>CTGCCGGGGCGCCGCGGCCCTGTTGAGGAACGCAGGCTCACG<br>GCCCTGGAGGATCTCATCAGCGCGATGTTCTGCGCGGCGGCG<br>AGGCCAGGCGATCGCCATGCTCCAGCAGCTGGTGGCGCAGTA<br>CCCACTGCGCGAGCGGTTCTGCGAGCTGCTGATGGTCGGCCTC<br>TACCGGGTGGGACGTCAGGGAGACGCCCTGGAGTCGTACCGCC<br>TGGCCAGGAAGCGGCTCGACGACGAACTGGGGGTCCAGCCGGG<br>CGCGCTGCTGCGCCGACGGCACGCCGAGATCCTCGCGCAGGAC<br>CCGGTCCTCAAGGTGCCCTCCGCGCTGTGGCGCGAGCCGTACG<br>CGCCGGCCGACACCAGCCTGCTCAGCGCCTGA |
|--|------------------------------------------------------------------------------------------------------------------------------------------------------------------------------------------------------------------------------------------------------------------------------------------------------------------------------------------------------------------------------------------------------------------------------------------------------------------------------------------------------------------------------------------------------------------------------------------------------------------------------------------------------------------------------------------------------------------------------------------------------------------------------------------------------------------------------------------------------------------------------------------------------------------------------------------------------------------------------------------------------|

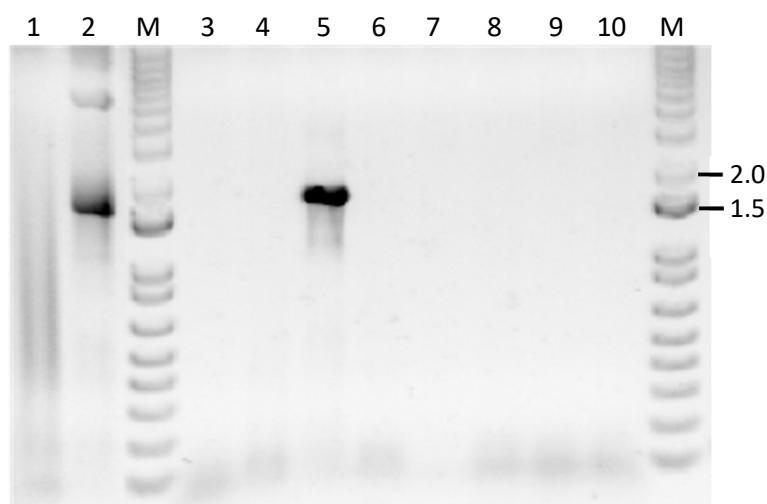

**Figure S40.** Representative screening of A1301 mutants integrated with *kasO*\*p-SCO6196 using primers ID 1 & 3 (Table S11); 1) Wild-type A1301 genome (negative control), 2) integrative plasmid (positive control), M) NEB 1 kb Plus DNA Ladder, 2.0 kb and 1.5 kb bands are annotated, 3-10) A1301 mutants. Mutants integrated with *kasO*\*p-SCO6196 cassette will have appearance of a band. Positive hits are further verified by sequencing.

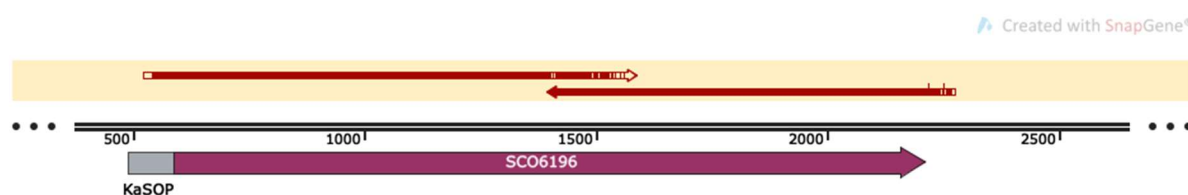

**Figure S41.** Representative sanger sequencing of PCR fragment to verify presence of *kasO*\*p and expression cassette SCO6196 (FAS).



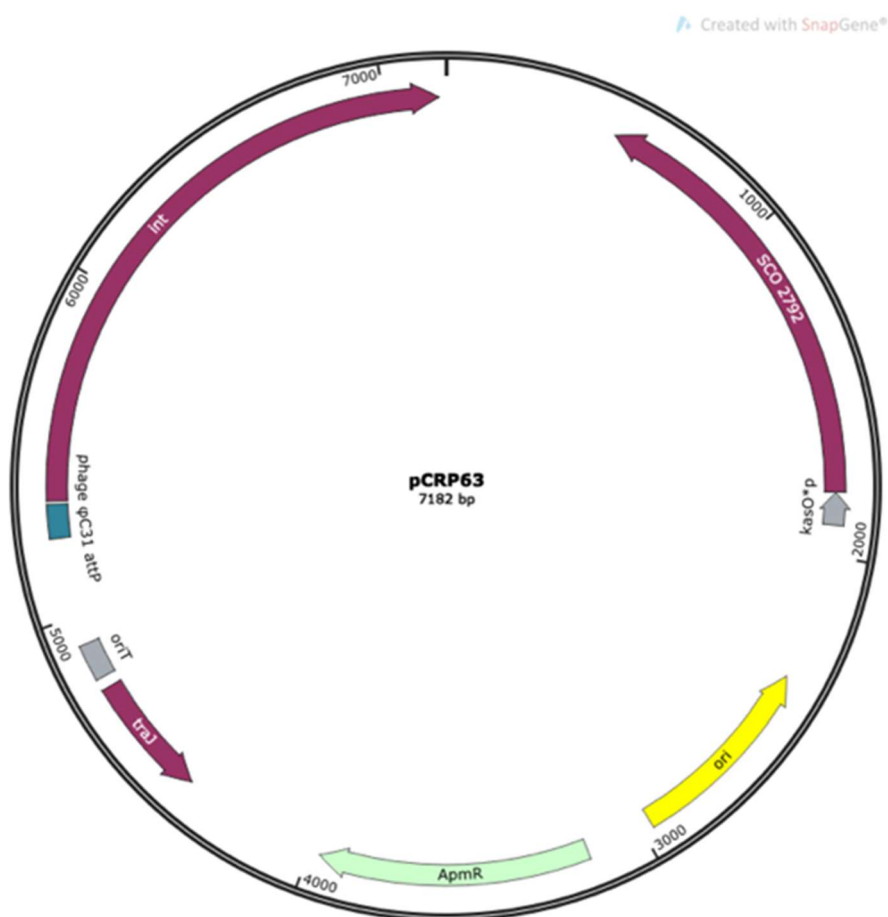

**Figure S42.** Plasmid map of pCRP63

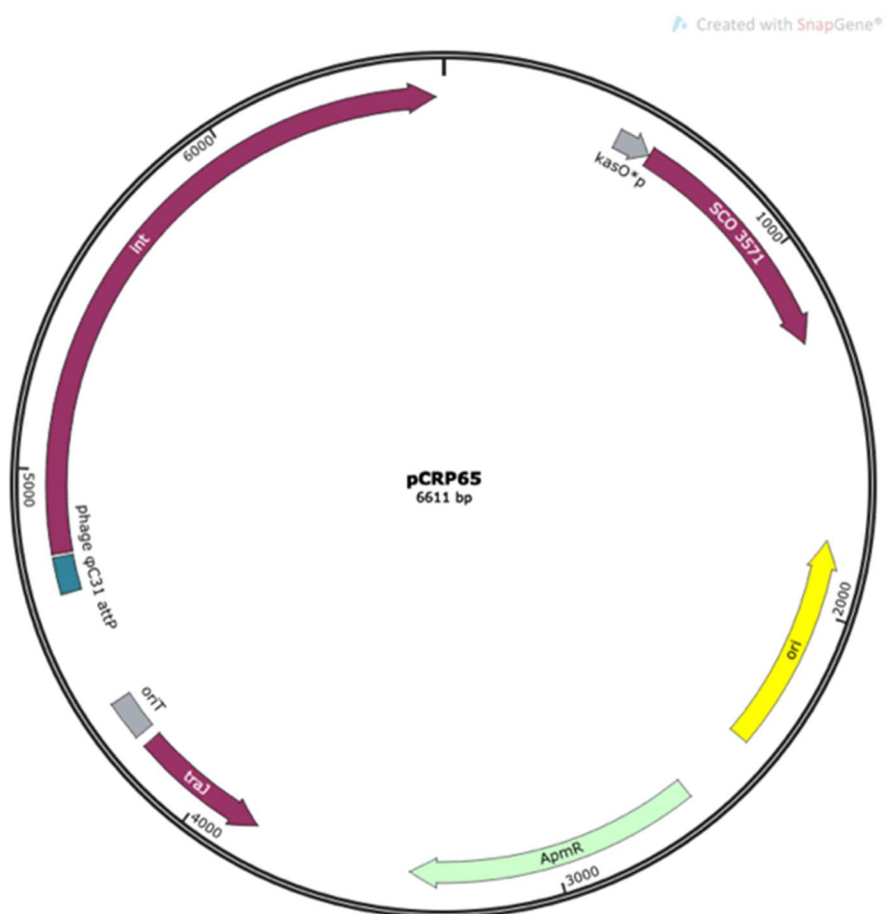

**Figure S43.** Plasmid map of pCRP65

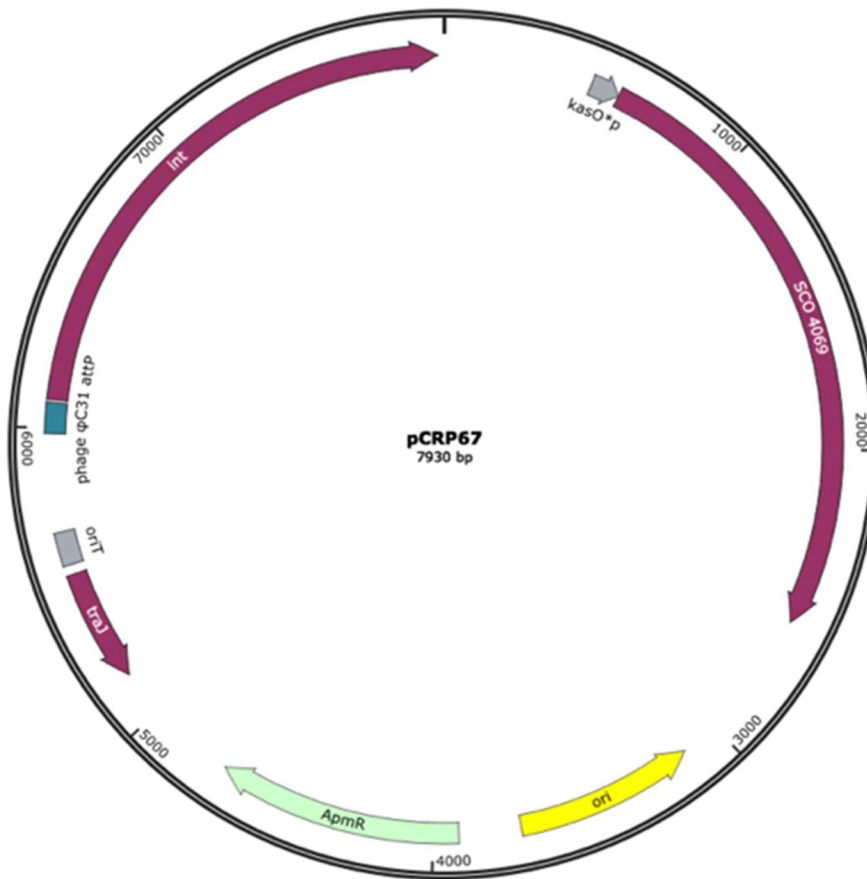

**Figure S44.** Plasmid map of pCRP67

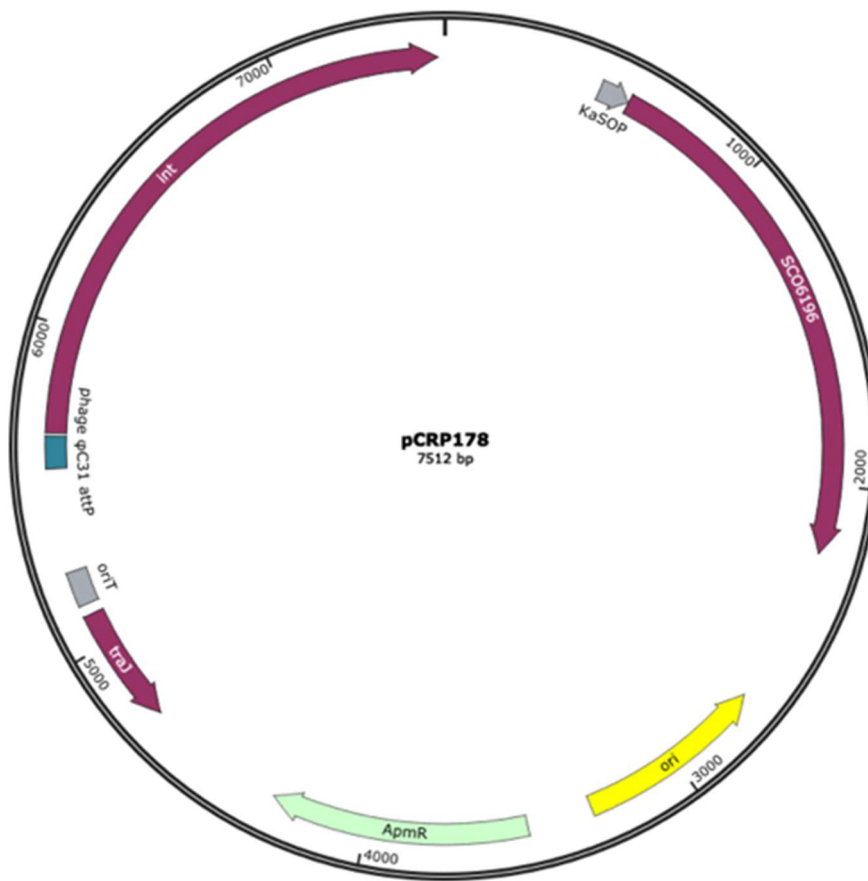

**Figure S45.** Plasmid map of pCRP178

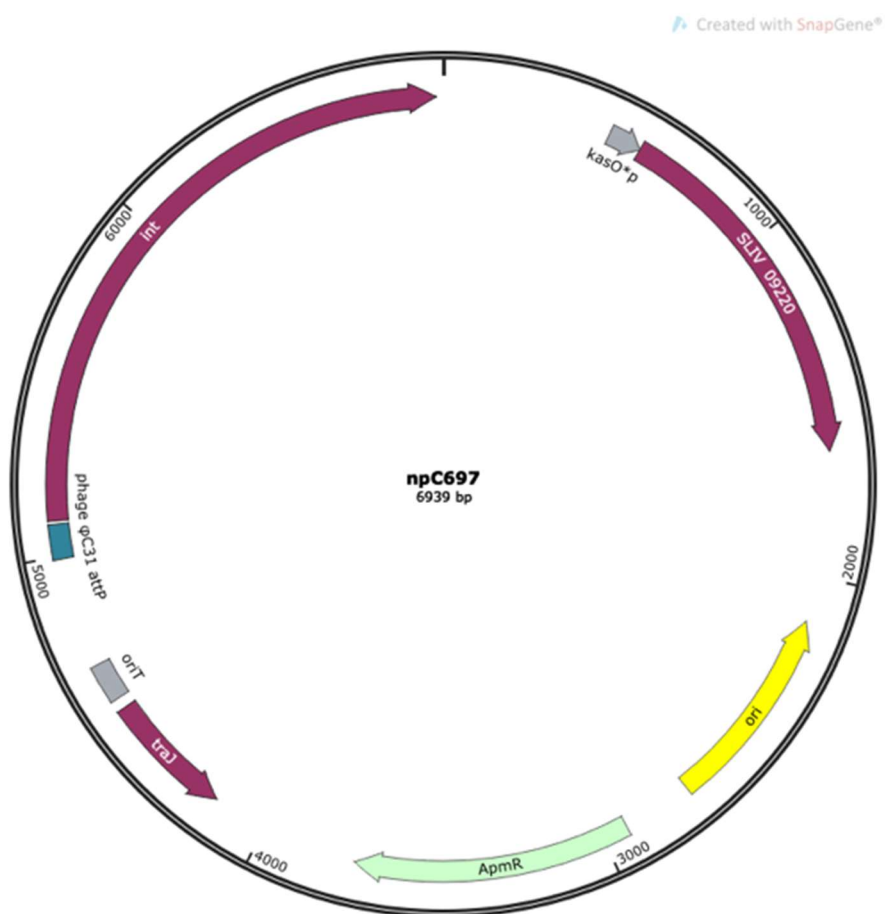

**Figure S46.** Plasmid map of npC697

## Supplementary References

- 1 Whitt, J., Shipley, S. M., Newman, D. J. & Zuck, K. M. Tetramic Acid Analogues Produced by Coculture of *Saccharopolyspora erythraea* with *Fusarium pallidoroseum*. *J. Nat. Prod.* **77**, 173-177 (2014).
- 2 Osterhage, C., Kaminsky, R., König, G. M. & Wright, A. D. Ascosalipyrrolidinone A, an Antimicrobial Alkaloid, from the Obligate Marine Fungus *Ascochyta salicorniae*. *J. Org. Chem.* **65**, 6412-6417 (2000).
- 3 Toda, S. *et al.* A new neuritogenetic compound BU-4514N produced by *Microtetraspora* sp. *J. Antibiot.* **46**, 875-883 (1993).
- 4 Hellwig, V. *et al.* Altersetin, a new antibiotic from cultures of endophytic *Alternaria* spp. Taxonomy, fermentation, isolation, structure elucidation and biological activities. *J. Antibiot.* **55**, 881-892 (2002).
- 5 Tsukamoto, M. *et al.* Antibacterial Substance BE-54476 And Its Production. (1998).
